# Supplementary material for: Exploring small non-coding RNAs as blood-based biomarkers to predict Alzheimer’s disease
Source: PubMed Central journal article supplement (PMC10790437; doi:10.1186/s13578-023-01190-5), 2024-01-16
Supplement: 13578_2023_1190_MOESM1_ESM.pdf [file 13578_2023_1190_MOESM1_ESM.pdf]

## ADDITIONAL FILES

eFigure 1. Flowchart of patient inclusion.

eMethods. Sequencing and processing of sncRNA and data processing.

eFigure 2. Heatmap of sncRNAs correlations. Spearman's rank correlation coefficient is shown for each correlation. Only significant correlations are shown (P value < .05).

eFigure 3. A literature search was carried out using the MEDLINE-PubMed database from inception through 10 April 2023. For the database searches, terms related to "miRNA" or "gene" were combined with terms related to Alzheimer's disease, cognition and brain. In each run, the miRNA's and the gene name were changed.

eTable 1. Characteristics of the A+(T|N)+ study participants according to their A, T and N profile.

eTable 2. Upregulated and downregulated Differentially Expressed sncRNAs comparing A+(T|N)+ with A-T-N-.

eFigure 4. Volcano plot of upregulated and downregulated Differentially Expressed sncRNAs comparing A+(T|N)+ with A-T-N-. (A) sncRNAs with P value < .05, (B) sncRNAs with Padj < .05 after FDR.

eTable 3. Conditional logistic regression analysis examining the individual associations between sncRNAs expression and A+(T|N)+.

eTable 4. Sensitivity analysis using logistic regression analysis to examine the individual associations between sncRNAs expression and A+(T|N)+.

eTable 5. Sensitivity analysis of sncRNAs associated with A+(T|N)+ in a logistic regression analysis. SncRNA are ranked from the highest to the lowest elastic net positive and negative regression coefficients for A+(T|N)+.

eTable 6. Upregulated and downregulated Differentially Expressed sncRNAs between AD-converters and AD non-converters.

eFigure 5. Volcano plot of upregulated and downregulated Differentially Expressed sncRNAs comparing AD-converters and AD non-converters. (A) sncRNAs with P value < .05, (B) sncRNAs with Padj < .05 after FDR.

eTable 7. Cox regression analysis examining the individual associations between sncRNAs expression and risk of progression from MCI to AD.

eTable 8. Genes regulated by the ATN-related sncRNA signature.

eTable 9. Genes regulated by the AD-related sncRNA signature.

eTable 10. Significantly enriched KEGG pathways for the ATN-related sncRNA signature.

eTable 11. Significantly enriched KEGG pathways for the AD-related sncRNA signature.

eTable 12. Significantly enriched GO terms in the ATN-related sncRNA signature.

eTable 13. Significantly enriched GO terms in the AD-related sncRNA signature.

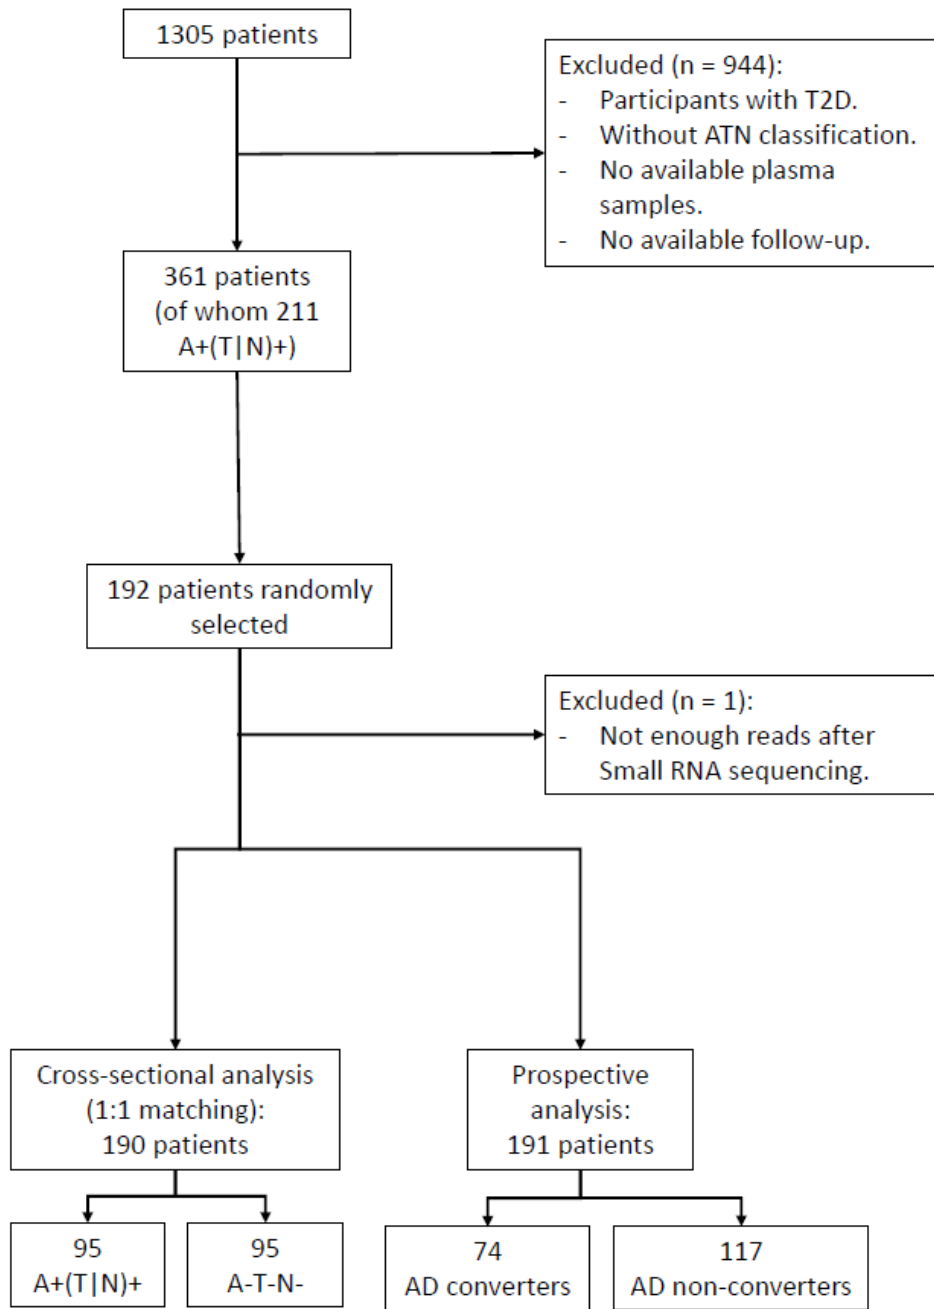

**eFigure 1** | Flowchart of patient inclusion.

Abbreviations: T2D, type 2 diabetes; AD, Alzheimer's disease.

## **eMethods** | Sequencing and processing of sncRNA.

Total RNA was isolated from 400  $\mu$ L of plasma using the Plasma/Serum RNA Purification Midi Kit (Norgen Biotek, Canada) and quantified with the Qubit RNA HS Assay Kit (Life Technologies, USA) on a Qubit fluorometer (Life Technologies, USA). Since the concentration of RNA was below the lower standard, the entire volume was concentrated in vacuo using the Savant SPD2010 Speedvac Concentrator (ThermoScientific, USA) and resuspended in 5  $\mu$ L of DNase/RNase-free water. SncRNAs were analyzed using Illumina TruSeq SncRNA Library Prep Kit (Illumina, USA), following the manufacturer's instructions. Briefly, RA5 and RA3 RNA oligonucleotides were ligated to 5' and 3' ends of RNA, respectively. Adapter-ligated RNA was reverse-transcribed using an RT Primer and the resulting cDNA was amplified in a 15-cycle PCR that used RP1 and indexed RP1 primers. A gel purification step was used to isolate PCR products of 145-160 bp through a 5% Mini-Protean TBE Gel (Biorad, USA). The integrity of the generated sncRNA sequencing library was confirmed using High Sensitivity D1000 Screen Tape Assay on 4200 TapeStation System (Agilent, USA), and it was quantified with the Qubit 1X dsDNA HS Assay Kit (Life Technologies, USA). The sncRNA expression profiling was generated from the NextSeq 2000 Sequencing System (Illumina, USA). Leftover RNA and cDNA were stored at  $-80^{\circ}\text{C}$ .

The Illumina DRAGEN Bio-IT Platform was used for the generation of raw, demultiplexed sequencing data. Quality control was performed using the FastQC (v0.11.9) software. Reads with a quality score of 20 or higher were filtered using Trim Galore tool (v0.6.7), which implements the Cutadapt tool for adapter trimming.

The mapping and quantification of sncRNAs were done in two different protocols: miRNA and other sncRNAs. For the identification of miRNAs, reads were mapped to the human genome(1) and quantified using mature and hairpin miRNA database references(2) using the miRDeep2 tool (v2.0.1.2). Duplicates were removed. For the identification of other sncRNAs, a BLAST (v.2.5.0) against the miRNA database was performed(2), kept the non-miRNA reads and a new BLAST against the sncRNA database(3) was performed.

**eFigure 2** | Heatmap of sncRNAs correlations. Spearman's rank correlation coefficient is shown for each correlation. Only significant correlations are shown (P value < .05).



**eFigure 3** | A literature search was carried out using the MEDLINE-PubMed database from inception through 10 April 2023. For the database searches, terms related to “miRNA” or “gene” were combined with terms related to Alzheimer’s disease, cognition and brain. In each run, the miRNA’s and the gene name were changed.

```
((mir-224-5p) OR (SKIL)) AND ((alzheimer) OR (MCI) OR (mild cognitive impairment) OR (brain) OR (neuron) OR (neurodegeneration) OR (cognitive decline) OR (memory) OR (aging))
```



**eTable 1** | Characteristics of the A+(T|N)+ study participants according to their A, T and N profile.

| Variable                             | A+T+N+ participants | A+T+N- and A+T-N+ participants | P value   |
|--------------------------------------|---------------------|--------------------------------|-----------|
| n                                    | 65                  | 31                             |           |
| Age (years)                          | 77.3 (72.4, 80.2)   | 74.9 (69.8, 79.9)              | 0.343     |
| Women [N (%)]                        | 36 (55.4)           | 11 (35.5)                      | 0.423     |
| Body mass index (kg/m <sup>2</sup> ) | 25.4 (23.4, 28.7)   | 25.5 (23.7, 28.4)              | 0.641     |
| APOE ε4 carriers [N (%)]             | 43 (66.2)           | 16 (51.6)                      | 0.171     |
| Education (years)                    | 8 (6, 10)           | 8 (6, 12)                      | 0.849     |
| Smoking [N (%)]                      |                     |                                |           |
| Never                                | 48 (73.8)           | 20 (64.5)                      | 0.053     |
| Former                               | 12 (18.5)           | 10 (32.3)                      | 0.024*    |
| Current                              | 5 (7.7)             | 1 (3.2)                        | 0.770     |
| Medication [N (%)]                   |                     |                                |           |
| Antidepressant and anxiolytic        | 24 (36.9)           | 9 (29.0)                       | 0.447     |
| Antihypertensive                     | 26 (40.0)           | 14 (45.2)                      | 0.632     |
| Statins                              | 16 (24.6)           | 12 (38.7)                      | 0.155     |
| Other lipid-lowering drugs           | 4 (6.2)             | 2 (6.5)                        | 0.978     |
| MMSE at baseline (score)             | 25 (24, 27)         | 26 (24, 28)                    | 0.402     |
| A [N (%)]                            | 65 (100.0)          | 31 (100.0)                     | 1.000     |
| T [N (%)]                            | 65 (100.0)          | 28 (90.3)                      | 0.011*    |
| N [N (%)]                            | 65 (100.0)          | 3 (9.7)                        | <0.001*** |
| Follow-up (years)                    | 1.7 (1.0, 2.7)      | 1.7 (1.0, 2.9)                 | 0.896     |
| Conversion to AD [N (%)]             | 47 (72.3)           | 22 (71.0)                      | 0.891     |

Abbreviations: MMSE, Mini-mental state examination; AD, Alzheimer's disease.

Continuous data are presented as median (interquartile range), and categorical variables are presented as number (%). The Mann-Whitney test was used for comparison of non-normally distributed continuous variables, and the X<sup>2</sup> was used for comparison of categorical variables. Only three participants were A+T-N+ and consequently were joined with the A+T+N- group. \*P value < .05, \*\*P value < .01, \*\*\*P value < .001.

**eTable 2** | Upregulated and downregulated Differentially Expressed sncRNAs comparing A+(T|N)+ with A-T-N-.

| sncRNA            | baseMean  | log <sub>2</sub> FC | lfcSE | stat   | P value | Padj  | Regulation |
|-------------------|-----------|---------------------|-------|--------|---------|-------|------------|
| hsa-miR-130b-5p   | 5.420     | 0.330               | 0.137 | 2.402  | 0.016   | 0.565 | Up         |
| hsa-miR-146b-5p   | 1886.588  | -0.194              | 0.087 | -2.241 | 0.025   | 0.674 | Down       |
| hsa-miR-151a-5p   | 204.766   | 0.259               | 0.075 | 3.447  | 0.001   | 0.118 | Up         |
| hsa-miR-221-5p    | 6.494     | 0.389               | 0.129 | 3.014  | 0.003   | 0.134 | Up         |
| hsa-miR-26a-5p    | 10699.047 | 0.103               | 0.047 | 2.174  | 0.030   | 0.674 | Up         |
| hsa-miR-26b-5p    | 1836.808  | 0.088               | 0.043 | 2.062  | 0.039   | 0.674 | Up         |
| hsa-miR-30c-5p    | 96.306    | 0.167               | 0.082 | 2.033  | 0.042   | 0.674 | Up         |
| hsa-miR-339-5p    | 5.368     | 0.480               | 0.164 | 2.917  | 0.004   | 0.147 | Up         |
| hsa-miR-382-5p    | 6.025     | -0.597              | 0.197 | -3.035 | 0.002   | 0.134 | Down       |
| hsa-miR-548k      | 15.239    | 0.269               | 0.086 | 3.127  | 0.002   | 0.134 | Up         |
| hsa-miR-744-5p    | 88.619    | 0.167               | 0.080 | 2.099  | 0.036   | 0.674 | Up         |
| tRNA-Tyr-GTA-11-1 | 21.284    | 0.862               | 0.424 | 2.032  | 0.042   | 0.674 | Up         |
| U45A              | 108.560   | -0.447              | 0.214 | -2.089 | 0.037   | 0.674 | Down       |

Padj using FDR. Padj < .05 was considered significant.

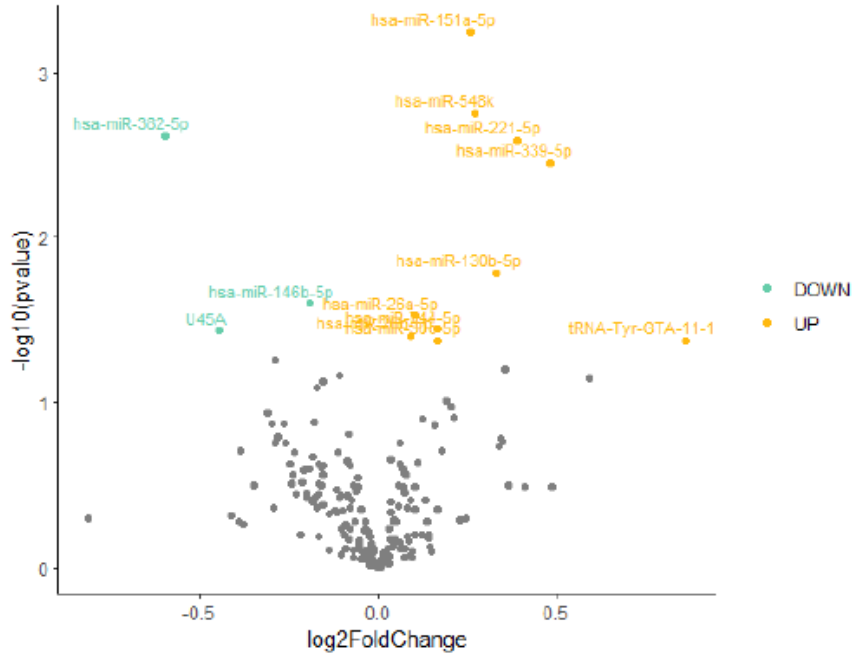

(A)

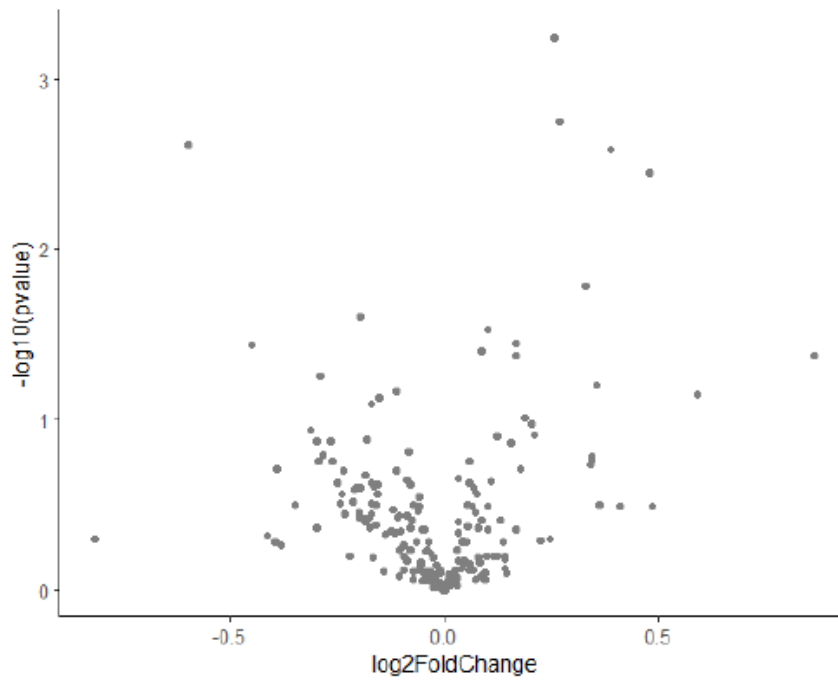

(B)

**eFigure 4** | Volcano plot of upregulated and downregulated Differentially Expressed sncRNAs comparing A+(T|N)+ with A-T-N-. (A) sncRNAs with P value < .05, (B) sncRNAs with Padj < .05 after FDR.

**eTable 3** | Conditional logistic regression analysis examining the individual associations between sncRNAs expression and A+(T|N)+.

| sncRNA           | Unadjusted model        |         |       | Model 1                 |         |       |
|------------------|-------------------------|---------|-------|-------------------------|---------|-------|
|                  | OR (95% CI)             | P value | Padj  | OR (95% CI)             | P value | Padj  |
| hsa-miR-130b-5p  | 1.389 (1.0334, 1.8669)  | 0.029   | 0.705 | 1.3243 (0.8367, 2.096)  | 0.231   | 0.994 |
| hsa-miR-146b-5p  | 0.7328 (0.5452, 0.9851) | 0.040   | 0.705 | 0.73 (0.4741, 1.1239)   | 0.153   | 0.994 |
| hsa-miR-151a-5p  | 1.7397 (1.251, 2.4193)  | 0.001   | 0.208 | 1.6678 (0.9703, 2.8666) | 0.064   | 0.994 |
| hsa-miR-221-5p   | 1.5214 (1.1103, 2.0848) | 0.009   | 0.312 | 1.1617 (0.7714, 1.7496) | 0.473   | 0.994 |
| hsa-miR-26a-5p   | 1.3664 (1.0166, 1.8367) | 0.039   | 0.705 | 1.2099 (0.7566, 1.935)  | 0.426   | 0.994 |
| hsa-miR-27b-5p   | 1.3263 (0.9915, 1.7742) | 0.057   | 0.792 | 1.7286 (1.0805, 2.7653) | 0.022   | 0.994 |
| hsa-miR-30c-5p   | 1.3559 (1.0007, 1.8372) | 0.049   | 0.781 | 1.3398 (0.7999, 2.2441) | 0.266   | 0.994 |
| hsa-miR-339-5p   | 1.6316 (1.1752, 2.2653) | 0.003   | 0.236 | 1.7428 (1.0193, 2.98)   | 0.042   | 0.994 |
| hsa-miR-382-5p   | 0.6456 (0.4729, 0.8814) | 0.006   | 0.304 | 0.7356 (0.4657, 1.162)  | 0.188   | 0.994 |
| hsa-miR-548ag    | 1.3584 (1.0131, 1.8215) | 0.041   | 0.705 | 1.6379 (1.0379, 2.5846) | 0.034   | 0.994 |
| hsa-miR-548k     | 1.6149 (1.1846, 2.2014) | 0.002   | 0.236 | 1.3953 (0.8811, 2.2097) | 0.156   | 0.994 |
| piR-31924        | 0.8858 (0.6534, 1.201)  | 0.435   | 0.984 | 0.6519 (0.4366, 0.9735) | 0.037   | 0.994 |
| piR-33043        | 1.3754 (1.0181, 1.858)  | 0.038   | 0.705 | 1.1593 (0.7557, 1.7784) | 0.499   | 0.994 |
| tRNA-Pro-AGG-2-3 | 1.5231 (1.1198, 2.0715) | 0.007   | 0.304 | 1.3558 (0.8687, 2.1162) | 0.180   | 0.994 |
| LSU-rRNA-Hsa     | 1.0853 (0.8101, 1.4541) | 0.583   | 0.984 | 0.6615 (0.4547, 0.9623) | 0.031   | 0.994 |
| U3               | 1.3709 (1.0234, 1.8364) | 0.034   | 0.705 | 1.0957 (0.7138, 1.6819) | 0.676   | 0.994 |
| U4               | 1.2717 (0.9455, 1.7103) | 0.112   | 0.984 | 1.631 (1.0302, 2.5822)  | 0.037   | 0.994 |

Abbreviations: OR, odds ratio; CI, confidence interval; MMSE, Mini-mental state examination.

Model 1 was adjusted for age, BMI, APOE  $\epsilon$ 4, smoking habit, education, use of anxiolytic or antidepressants, antihypertensive drugs, statins, and other lipid-lowering medication, and baseline MMSE. \*P<sub>adj</sub> < .05, \*\*P<sub>adj</sub> < .01, \*\*\*P<sub>adj</sub> < .001.

**eTable 4 |** Sensitivity analysis using logistic regression analysis to examine the individual associations between sncRNAs expression and A+(T|N)+.

| sncRNA           | Unadjusted model     |         |       | Model 1              |         |       |
|------------------|----------------------|---------|-------|----------------------|---------|-------|
|                  | OR (95% CI)          | P value | Padj  | OR (95% CI)          | P value | Padj  |
| hsa-miR-130b-5p  | 1.392 (1.040, 1.888) | 0.029   | 0.614 | 1.329 (0.842, 2.136) | 0.227   | 0.990 |
| hsa-miR-146b-5p  | 0.728 (0.537, 0.973) | 0.035   | 0.614 | 0.726 (0.463, 1.114) | 0.148   | 0.990 |
| hsa-miR-151a-5p  | 1.713 (1.259, 2.390) | 0.001   | 0.159 | 1.686 (0.999, 3.013) | 0.061   | 0.990 |
| hsa-miR-221-5p   | 1.530 (1.128, 2.131) | 0.009   | 0.295 | 1.165 (0.768, 1.776) | 0.469   | 0.990 |
| hsa-miR-26a-5p   | 1.376 (1.030, 1.862) | 0.034   | 0.614 | 1.215 (0.760, 1.977) | 0.420   | 0.990 |
| hsa-miR-26b-5p   | 1.364 (1.021, 1.843) | 0.038   | 0.614 | 1.048 (0.649, 1.706) | 0.850   | 0.990 |
| hsa-miR-27b-5p   | 1.326 (0.994, 1.785) | 0.058   | 0.806 | 1.742 (1.104, 2.870) | 0.022   | 0.990 |
| hsa-miR-30c-5p   | 1.354 (1.013, 1.836) | 0.044   | 0.660 | 1.352 (0.810, 2.315) | 0.257   | 0.990 |
| hsa-miR-339-5p   | 1.675 (1.220, 2.371) | 0.002   | 0.159 | 1.775 (1.060, 3.185) | 0.040   | 0.990 |
| hsa-miR-382-5p   | 0.638 (0.460, 0.830) | 0.005   | 0.250 | 0.731 (0.451, 1.143) | 0.182   | 0.990 |
| hsa-miR-548ag    | 1.366 (1.022, 1.846) | 0.038   | 0.614 | 1.651 (1.059, 2.676) | 0.032   | 0.990 |
| hsa-miR-548k     | 1.616 (1.197, 2.225) | 0.002   | 0.159 | 1.401 (0.887, 2.256) | 0.153   | 0.990 |
| piR-31924        | 0.881 (0.619, 1.179) | 0.415   | 0.994 | 0.647 (0.423, 0.992) | 0.035   | 0.990 |
| piR-33043        | 1.402 (1.045, 1.918) | 0.028   | 0.614 | 1.167 (0.759, 1.830) | 0.487   | 0.990 |
| tRNA-Pro-AGG-2-3 | 1.525 (1.133, 2.095) | 0.007   | 0.283 | 1.362 (0.868, 2.145) | 0.177   | 0.990 |
| LSU-rRNA-Hsa     | 1.082 (0.809, 1.502) | 0.598   | 0.994 | 0.657 (0.441, 0.980) | 0.029   | 0.990 |
| U3               | 1.390 (1.041, 1.876) | 0.028   | 0.614 | 1.100 (0.714, 1.706) | 0.665   | 0.990 |
| U4               | 1.264 (0.946, 1.721) | 0.122   | 0.994 | 1.640 (1.053, 2.686) | 0.036   | 0.990 |

Abbreviations: OR, odds ratio; CI, confidence interval; MMSE, Mini-mental state examination.

Model 1 was adjusted for age, sex, BMI, APOE ε4, smoking habit, education, use of anxiolytic or antidepressants, antihypertensive drugs, statins, and other lipid-lowering medication, and baseline MMSE. \*Padj < .05, \*\*Padj < .01, \*\*\*Padj < .001.

**eTable 5** | Sensitivity analysis of sncRNAs associated with A+(T|N)+ in a logistic regression analysis. SncRNA are ranked from the highest to the lowest elastic net positive and negative regression coefficients for A+(T|N)+.

| <b>sncRNA</b>  | <b>#a</b> | <b>β (95% CI)</b>    | <b>sncRNA</b>   | <b>#a</b> | <b>β (95% CI)</b>       |
|----------------|-----------|----------------------|-----------------|-----------|-------------------------|
| hsa-miR-339-5p | 100       | 0.145 (0.136, 0.153) | hsa-miR-382-5p  | 100       | -0.179 (-0.188, -0.170) |
| hsa-miR-548k   | 100       | 0.143 (0.131, 0.154) | hsa-miR-146b-5p | 100       | -0.131 (-0.141, -0.122) |

Abbreviations: #a, Occurrence of metabolites (out of 100) in the elastic net conditional logistic regression; sncRNA, small non-coding RNA; hsa, Homo sapiens; CI, confidence interval.



**eTable 6** | Upregulated and downregulated Differentially Expressed sncRNAs between AD-converters and AD non-converters.

| sncRNA            | baseMean  | log <sub>2</sub> FC | lfcSE | stat   | P value | Padj   | Regulation |
|-------------------|-----------|---------------------|-------|--------|---------|--------|------------|
| hsa-let-7a-5p     | 3023.850  | 0.134               | 0.055 | 2.422  | 0.015   | 0.239  | Up         |
| hsa-let-7f-5p     | 12233.306 | 0.227               | 0.085 | 2.677  | 0.007   | 0.239  | Up         |
| hsa-miR-10a-5p    | 2344.771  | -0.183              | 0.089 | -2.056 | 0.040   | 0.331  | Down       |
| hsa-miR-130b-5p   | 5.420     | 0.316               | 0.141 | 2.250  | 0.024   | 0.255  | Up         |
| hsa-miR-134-5p    | 33.236    | -0.331              | 0.149 | -2.221 | 0.026   | 0.261  | Down       |
| hsa-miR-150-5p    | 62.127    | -0.324              | 0.143 | -2.266 | 0.023   | 0.255  | Down       |
| hsa-miR-151a-5p   | 204.766   | 0.293               | 0.077 | 3.801  | 0.000   | 0.030* | Up         |
| hsa-miR-21-5p     | 6795.002  | 0.070               | 0.029 | 2.381  | 0.017   | 0.239  | Up         |
| hsa-miR-221-5p    | 6.494     | 0.410               | 0.131 | 3.136  | 0.002   | 0.089  | Up         |
| hsa-miR-26a-5p    | 10699.047 | 0.119               | 0.049 | 2.434  | 0.015   | 0.239  | Up         |
| hsa-miR-26b-5p    | 1836.808  | 0.119               | 0.044 | 2.712  | 0.007   | 0.239  | Up         |
| hsa-miR-30c-5p    | 96.306    | 0.209               | 0.084 | 2.474  | 0.013   | 0.239  | Up         |
| hsa-miR-345-5p    | 29.522    | -0.186              | 0.090 | -2.077 | 0.038   | 0.327  | Down       |
| hsa-miR-382-5p    | 6.025     | -0.690              | 0.204 | -3.376 | 0.001   | 0.051  | Down       |
| hsa-miR-485-5p    | 4.928     | -0.445              | 0.214 | -2.082 | 0.037   | 0.327  | Down       |
| hsa-miR-493-5p    | 56.626    | -0.364              | 0.155 | -2.357 | 0.018   | 0.239  | Down       |
| hsa-miR-548ag     | 7.793     | 0.249               | 0.117 | 2.136  | 0.033   | 0.309  | Up         |
| hsa-miR-548d-5p   | 9.170     | 0.273               | 0.107 | 2.551  | 0.011   | 0.239  | Up         |
| hsa-miR-548k      | 15.239    | 0.310               | 0.088 | 3.541  | 0.000   | 0.042* | Up         |
| hsa-miR-98-5p     | 496.171   | 0.110               | 0.055 | 1.985  | 0.047   | 0.372  | Up         |
| piR-33043         | 51.833    | 0.478               | 0.197 | 2.427  | 0.015   | 0.239  | Up         |
| piR-35982         | 36.664    | -0.530              | 0.202 | -2.621 | 0.009   | 0.239  | Down       |
| tRNA-Arg-CCT-4-1  | 23.134    | -0.534              | 0.222 | -2.401 | 0.016   | 0.239  | Down       |
| tRNA-Cys-GCA-17-1 | 31.848    | -0.373              | 0.189 | -1.974 | 0.048   | 0.372  | Down       |
| SSU-rRNA-Hsa      | 42.313    | -0.496              | 0.215 | -2.311 | 0.021   | 0.241  | Down       |
| ACA45             | 40.174    | -0.248              | 0.097 | -2.563 | 0.010   | 0.239  | Down       |
| mgU6-77           | 11.710    | -0.710              | 0.308 | -2.310 | 0.021   | 0.241  | Down       |

NOTE. Padj using FDR. Padj < 0.05 was considered significant.



**eTable 7** | Cox regression analysis examining the individual associations between sncRNAs expression and risk of progression from MCI to AD.

| sncRNA          | Unadjusted model     |         |        | Model 1              |         |           |
|-----------------|----------------------|---------|--------|----------------------|---------|-----------|
|                 | HR (95% CI)          | P value | Padj   | HR (95% CI)          | P value | Padj      |
| hsa-let-7a-5p   | 1.286 (1.030, 1.605) | 0.026   | 0.361  | 1.157 (0.911, 1.470) | 0.233   | 0.964     |
| hsa-let-7f-5p   | 1.348 (1.056, 1.721) | 0.017   | 0.270  | 1.306 (1.036, 1.646) | 0.024   | 0.677     |
| hsa-miR-106b-5p | 0.880 (0.691, 1.122) | 0.303   | 0.853  | 0.670 (0.454, 0.987) | 0.043   | 0.677     |
| hsa-miR-146b-5p | 0.946 (0.744, 1.203) | 0.653   | 0.899  | 1.378 (1.047, 1.814) | 0.022   | 0.677     |
| hsa-miR-15a-5p  | 0.659 (0.295, 1.471) | 0.308   | 0.853  | 0.206 (0.066, 0.639) | 0.006   | 0.645     |
| hsa-miR-151a-5p | 1.508 (1.214, 1.872) | <0.001  | 0.042* | 1.086 (0.860, 1.371) | 0.491   | 0.964     |
| hsa-miR-181c-5p | 0.821 (0.542, 1.245) | 0.354   | 0.853  | 0.449 (0.211, 0.958) | 0.038   | 0.677     |
| hsa-miR-191-5p  | 0.969 (0.766, 1.227) | 0.795   | 0.949  | 1.370 (1.036, 1.813) | 0.028   | 0.677     |
| hsa-miR-20a-5p  | 0.893 (0.701, 1.136) | 0.357   | 0.853  | 0.707 (0.510, 0.978) | 0.037   | 0.677     |
| hsa-miR-21-5p   | 1.288 (1.027, 1.616) | 0.029   | 0.361  | 1.178 (0.861, 1.611) | 0.307   | 0.964     |
| hsa-miR-221-5p  | 1.310 (1.084, 1.581) | 0.005   | 0.152  | 1.179 (0.918, 1.513) | 0.197   | 0.964     |
| hsa-miR-26a-5p  | 1.293 (1.026, 1.631) | 0.030   | 0.361  | 1.051 (0.823, 1.34)  | 0.692   | 0.999     |
| hsa-miR-26b-5p  | 1.348 (1.055, 1.722) | 0.017   | 0.270  | 1.127 (0.863, 1.471) | 0.382   | 0.964     |
| hsa-miR-30c-5p  | 1.321 (1.060, 1.647) | 0.013   | 0.270  | 1.043 (0.837, 1.298) | 0.709   | 0.999     |
| hsa-miR-30e-5p  | 1.064 (0.847, 1.335) | 0.596   | 0.899  | 0.742 (0.551, 0.999) | 0.049   | 0.677     |
| hsa-miR-339-5p  | 1.357 (1.109, 1.661) | 0.003   | 0.152  | 1.004 (0.795, 1.269) | 0.970   | 0.999     |
| hsa-miR-382-5p  | 0.670 (0.508, 0.884) | 0.005   | 0.152  | 0.803 (0.598, 1.078) | 0.144   | 0.841     |
| hsa-miR-493-5p  | 0.582 (0.352, 0.961) | 0.034   | 0.396  | 0.772 (0.481, 1.238) | 0.282   | 0.964     |
| hsa-miR-548ag   | 1.315 (1.048, 1.648) | 0.018   | 0.270  | 1.199 (0.933, 1.54)  | 0.156   | 0.841     |
| hsa-miR-548d-5p | 1.351 (1.070, 1.705) | 0.011   | 0.261  | 1.311 (1.012, 1.700) | 0.041   | 0.677     |
| hsa-miR-548k    | 1.514 (1.194, 1.921) | 0.001   | 0.062  | 1.215 (0.927, 1.593) | 0.158   | 0.841     |
| hsa-miR-584-5p  | 1.207 (0.960, 1.516) | 0.107   | 0.853  | 1.851 (1.375, 2.491) | <0.001  | <0.001*** |

|                  |                      |       |       |                      |       |       |
|------------------|----------------------|-------|-------|----------------------|-------|-------|
| hsa-miR-99b-5p   | 1.159 (0.918, 1.463) | 0.216 | 0.853 | 1.321 (1.012, 1.724) | 0.041 | 0.677 |
| piR-33043        | 1.398 (1.132, 1.72)  | 0.002 | 0.125 | 1.258 (0.995, 1.592) | 0.056 | 0.722 |
| piR-33151        | 1.330 (1.090, 1.624) | 0.005 | 0.152 | 1.164 (0.907, 1.494) | 0.234 | 0.964 |
| piR-44717        | 1.129 (0.922, 1.384) | 0.241 | 0.853 | 1.223 (1.008, 1.487) | 0.042 | 0.677 |
| tRNA-Asp-GTC-3-1 | 1.141 (0.916, 1.421) | 0.238 | 0.853 | 1.275 (1.009, 1.611) | 0.042 | 0.677 |
| tRNA-Glu-CTC-1-7 | 0.985 (0.794, 1.221) | 0.889 | 0.974 | 1.339 (1.005, 1.783) | 0.046 | 0.677 |
| tRNA-Gly-CCC-1-2 | 1.331 (1.077, 1.645) | 0.008 | 0.213 | 1.113 (0.878, 1.412) | 0.377 | 0.964 |
| tRNA-Pro-AGG-2-3 | 1.261 (1.040, 1.528) | 0.018 | 0.270 | 0.970 (0.736, 1.278) | 0.827 | 0.999 |
| tRNA-Ser-GCT-4-1 | 1.130 (0.909, 1.404) | 0.271 | 0.853 | 1.364 (1.019, 1.825) | 0.037 | 0.677 |

Abbreviations: HR, hazard ratio; CI, confidence interval; MMSE, Mini-mental state examination.

Model 1 was adjusted for ATN at baseline, age, sex, BMI, *APOE*  $\epsilon$ 4, smoking habit, education, use of anxiolytic or antidepressants, antihypertensive drugs, statins, and other lipid-lowering medication, and baseline MMSE. \**P*<sub>adj</sub> < .05, \*\**P*<sub>adj</sub> < .01, \*\*\**P*<sub>adj</sub> < .001.

**eTable 8** | Genes regulated by the ATN-related sncRNA signature.

| Gene Symbol    | Gene Name                                   | miRNA regulation                      | Functions related to AD                                                                                                                                                                                                                                       | References |
|----------------|---------------------------------------------|---------------------------------------|---------------------------------------------------------------------------------------------------------------------------------------------------------------------------------------------------------------------------------------------------------------|------------|
| <i>ILF3</i>    | Interleukin enhancer binding factor 3       | ↑ hsa-miR-221-5p<br>↓ hsa-miR-382-5p  | Transcriptional suppressor of the LOAD risk gene <i>HLA-DQA1</i> , which has been found upregulated in AD patient's hippocampus.                                                                                                                              | (4,5)      |
| <i>CTNNB1</i>  | Catenin Beta 1                              | ↑ hsa-miR-221-5p                      | When the Wnt/β-catenin ( <i>CTNNB1</i> ) is activated, β-catenin facilitates gene transcription, while when this pathway is inactivated, β-catenin is degraded. Mutations of <i>CTNNB1</i> disturb synaptic plasticity, neuronal apoptosis, and neurogenesis. | (6,7)      |
| <i>FAM98B</i>  | Family with sequence similarity 98 member B | ↓ hsa-miR-146b-5p<br>↓ hsa-miR-382-5p | It shuttles between the nucleus and the cytoplasm, transporting RNAs, and modulates the translation of specific neuronal mRNAs.                                                                                                                               | (1,2)      |
| <i>DDX6</i>    | DEAD-box helicase 6                         | ↑ hsa-miR-548k<br>↑ hsa-miR-144-5p    | Tau binds directly to DDX6 and increases miRNAs miR-21, miR-124 and let-7 silencing activity, which have been related to AD pathology.                                                                                                                        | (8)        |
| <i>CARHSP1</i> | Calcium regulated heat stable protein 1     | ↑ hsa-miR-548k<br>↑ hsa-miR-144-5p    | Oligodendrogenic transcription factor downregulated in the brain of <i>Ulk4<sup>tm1a/tm1a</sup></i> mice, characterized by impaired myelination.                                                                                                              | (3)        |
| <i>DDX21</i>   | DExD-box helicase 21                        | ↓ hsa-miR-146b-5p<br>↑ hsa-miR-339-5p | RNA helicase which coordinates ribosomal RNA transcription and processing, RNA editing, RNA transport, and nuclear and mitochondrial splicing.<br><br>Downregulated in the anterior cingulate of bipolar disorder patients.                                   | (4)        |

|                |                                            |                                                                         |                                                                                                                                                                                                                                                                                                                                                                                                                                                                                                                                      |         |
|----------------|--------------------------------------------|-------------------------------------------------------------------------|--------------------------------------------------------------------------------------------------------------------------------------------------------------------------------------------------------------------------------------------------------------------------------------------------------------------------------------------------------------------------------------------------------------------------------------------------------------------------------------------------------------------------------------|---------|
| <i>RNF19A</i>  | Ring finger protein 19A                    | <p>↑ hsa-miR-221-5p</p> <p>↑ hsa-miR-339-5p</p>                         | <p>Rnf19a-deficient mice have been found to have reduced adult neurogenesis and enhanced long-term potentiation in the dentate gyrus. Also implicated in amyotrophic lateral sclerosis and Parkinson's disease.</p>                                                                                                                                                                                                                                                                                                                  | (9)     |
| <i>SKIL</i>    | SKI like proto-oncogene                    | <p>↑ hsa-miR-548k</p> <p>↓ hsa-miR-382-5p</p>                           | <p>Promotes the expression of cell proliferation genes and concomitantly represses the differentiation genes in granule neuron precursors of mice cerebellum.</p> <p>It also plays a dual role as a corepressor or coactivator of <i>TGFβ</i>-induced transcription in postmitotic neurons and drives axonal growth.</p>                                                                                                                                                                                                             | (10,11) |
| <i>CBX6</i>    | Chromobox 6                                | <p>↑ hsa-miR-221-5p</p> <p>↓ hsa-miR-146b-5p</p>                        | <p>Causative gene associated with <i>Nbg15</i> for the development of T2D, a risk factor for AD.</p>                                                                                                                                                                                                                                                                                                                                                                                                                                 | (12)    |
| <i>HNRNPA1</i> | Heterogeneous nuclear ribonucleoprotein A1 | <p>↑ hsa-miR-221-5p</p> <p>↑ hsa-miR-339-5p</p> <p>↓ hsa-mir-382-5p</p> | <p>Affects the alternative splicing of an exon of <i>CD33</i>. This gene is an immune receptor on the membrane of microglia and macrophages, have been found increased in human AD brains and correlated with plaque burden as well as insoluble Aβ<sub>42</sub> levels. Mice lacking Cd33 showed a reduced burden of amyloid plaques and insoluble Aβ<sub>42</sub>. Regulation of <i>CD33</i> splicing through <i>HNRNPA1</i> is associated with reduced risk of AD and decreased suppressive signaling on microglial activity.</p> | (13–15) |
| <i>CUL3</i>    | Cullin 3                                   | <p>↑ hsa-miR-144-5p</p> <p>↑ hsa-miR-339-5p</p>                         | <p>Downregulation of the ubiquitin ligase (E3) gene <i>CUL3</i> in brain exacerbates AD through <i>NRF2</i> aggregation and impaired oxidative stress protection.</p>                                                                                                                                                                                                                                                                                                                                                                | (16,17) |
| <i>SMAD4</i>   | SMAD family member 4                       | <p>↑ hsa-miR-144-5p</p> <p>↑ hsa-miR-221-5p</p> <p>↑ hsa-miR-339-5p</p> | <p>Tgfb1(-/-) mice with <i>Smad4</i> inhibition exhibit highly increased neuronal apoptosis.</p> <p>Mice with <i>Smad4</i> blockage exhibited <i>BACE</i> upregulation, <i>APP</i> degradation, tangle formation and Aβ generation in the brain.</p>                                                                                                                                                                                                                                                                                 | (18,19) |

|              |                                                   |                                                                                                                                                   |                                                                                                                                                                                                                                                                                                                                                                           |         |
|--------------|---------------------------------------------------|---------------------------------------------------------------------------------------------------------------------------------------------------|---------------------------------------------------------------------------------------------------------------------------------------------------------------------------------------------------------------------------------------------------------------------------------------------------------------------------------------------------------------------------|---------|
| <i>MYLIP</i> | Myosin regulatory light chain interacting protein | <ul style="list-style-type: none"> <li>↑ hsa-miR-548k</li> <li>↑ hsa-miR-221-5p</li> <li>↑ hsa-miR-339-5p</li> </ul>                              | Promotes the ubiquitylation and subsequent lysosomal degradation of LDLR. Genetic ablation of <i>MYLIP</i> increases LDLR, which facilitates A $\beta$ uptake and clearance by microglia in the brains of APP/PS1 mice. Also, <i>MYLIP</i> inhibition upregulates lysosomal/phagocytic genes in microglia.                                                                | (7)     |
| <i>SOD2</i>  | Superoxide dismutase 2                            | <ul style="list-style-type: none"> <li>↑ hsa-miR-144-5p</li> <li>↑ hsa-miR-221-5p</li> <li>↑ hsa-miR-339-5p</li> <li>↓ hsa-miR-382-5p</li> </ul>  | Antioxidant enzyme that maintains the control of ROS. <i>SOD2</i> polymorphisms have been associated with increased susceptibility to oxidative stress. The relationship between <i>SOD2</i> rs4880 polymorphism and AD have yielded inconsistent results, but in combination with <i>APO<math>\epsilon</math>4</i> allele carriage it increases the risk for MCI and AD. | (20,21) |
| <i>PRPF8</i> | Pre-mRNA processing factor 8                      | <ul style="list-style-type: none"> <li>↑ hsa-miR-144-5p</li> <li>↑ hsa-miR-221-5p</li> <li>↓ hsa-miR-146b-5p</li> <li>↓ hsa-miR-382-5p</li> </ul> | Regulation of glutamatergic neurotransmission in brain cortex. Homozygous mice expressing the aberrant Prpf8 variants developed atrophy of the cerebellum because of extensive granule cell loss.                                                                                                                                                                         | (22,23) |

---

Abbreviations: LOAD, Late Onset Alzheimer's disease; AD, Alzheimer's disease; T2D, type 2 diabetes; ROS, reactive oxygen species; LDLR, low density lipoprotein receptor; MCI, mild cognitive impairment.

**eTable 9** | Genes regulated by the AD-related sncRNA signature.

| Gene Symbol   | Gene Name                                     | miRNA Regulation                                                        | Function related to AD                                                                                                                                                                                                                                                                                                                                                                                                                                                                                                                                                                            | References |
|---------------|-----------------------------------------------|-------------------------------------------------------------------------|---------------------------------------------------------------------------------------------------------------------------------------------------------------------------------------------------------------------------------------------------------------------------------------------------------------------------------------------------------------------------------------------------------------------------------------------------------------------------------------------------------------------------------------------------------------------------------------------------|------------|
| <i>B2M</i>    | Beta-2-microglobulin                          | <p>↑ hsa-miR-548d-5p</p> <p>↓ hsa-miR-224-5p</p>                        | <p><i>B2M</i> is part of the MHC I complex, which exhibits increased expression in samples from AD patients, and impairs neuronal plasticity, neurite growth, and neurite regeneration.</p> <p>It is a membrane marker of senescence and blood biomarker of AD. The increase in <i>B2M</i> is related to a decline in cognitive scores, to the pathological changes of A<math>\beta</math> (low CSF A<math>\beta</math>1-42), but not to neurodegeneration or tau pathology.</p> <p>Compared with young mice, old mice experience elevated <i>B2M</i> levels in their hippocampus and plasma.</p> | (24–27)    |
| <i>GAPDH</i>  | Glyceraldehyde-3-phosphate dehydrogenase      | <p>↓ hsa-miR-224-5p</p> <p>↑ hsa-miR-221-5p</p>                         | <p>Interaction between <i>GAPDH</i> and AD proteins through oxidative stress in brain. Specimens of AD, including A<math>\beta</math>, A<math>\beta</math> precursor protein and Tau, leads to impairment of the <i>GAPDH</i> glycolytic function in AD and thus in apoptosis. Proapoptotic factor abundant in the blood of AD patients.</p>                                                                                                                                                                                                                                                      | (28–31)    |
| <i>SEC24C</i> | SEC24 homolog C, COPII coat complex component | <p>↑ hsa-miR-877-5p</p> <p>↓ hsa-miR-224-5p</p> <p>↑ hsa-miR-221-5p</p> | <p>The family of SEC24p oversee vesicle trafficking, including shaping vesicle, cargo selection and concentration, of subunits of the <math>\gamma</math>-secretase (involved in A<math>\beta</math> production). <i>SEC24C</i> transports the <math>\gamma</math>-subunit nicastrin.</p>                                                                                                                                                                                                                                                                                                         | (32)       |
| <i>ARIH2</i>  | Ariadne RBR E3 ubiquitin protein ligase 2     | <p>↓ hsa-miR-224-5p</p> <p>↓ hsa-miR-382-5p</p>                         | <p>In spinal cord injury, <i>ARIH2</i> overexpression promotes neurotrophic growth factor expression, brain-derived neurotrophic factor expression, astrocyte and neuronal viability, neuroprotective cytokine pleiotrophin, neurite outgrowth, and suppressed astrocyte apoptosis. Knockdown of <i>ARIH2</i>-derived Triad1 protein has the opposite effects.</p>                                                                                                                                                                                                                                | (33)       |



|               |                                            |                                                                                                 |                                                                                                                                                                                                                                                                                            |         |
|---------------|--------------------------------------------|-------------------------------------------------------------------------------------------------|--------------------------------------------------------------------------------------------------------------------------------------------------------------------------------------------------------------------------------------------------------------------------------------------|---------|
| <i>ELAVL1</i> | ELAV like RNA binding protein 1            | <p>↓ hsa-miR-625-5p</p> <p>↑ hsa-miR-221-5p</p>                                                 | Downregulated <i>ELAVL1</i> may reduce the abundance and type of mRNA in AD patients through modulation of mRNA stability and promotion of variable cleavage of precursor RNA.                                                                                                             | (34,35) |
| <i>TNRC6A</i> | Trinucleotide repeat containing adaptor 6A | <p>↑ hsa-miR-548d-5p</p> <p>↓ hsa-miR-769-5p</p> <p>↓ hsa-miR-224-5p</p>                        | <i>TNRC6A</i> promotes dendritic growth, both in the hippocampus and cerebellum, by regulating global somatodendritic translation and actin cytoskeletal dynamics of developing neurons. Perturbation of this protein results in reduced dendritic growth of cultured hippocampal neurons. | (36)    |
| <i>EPAS1</i>  | Endothelial PAS domain protein 1           | <p>↓ hsa-miR-625-5p</p> <p>↓ hsa-miR-224-5p</p>                                                 | This oxygen-dependent transcription factor is the major regulator of <i>EPO</i> , which has neuroprotective and pro-angiogenesis effects, and triggers responses to hypoxia including metabolic adaptation and angiogenesis.                                                               | (37)    |
| <i>TNRC6B</i> | Trinucleotide repeat containing adaptor 6B | <p>↓ hsa-miR-625-5p</p> <p>↓ hsa-miR-224-5p</p> <p>↑ hsa-miR-221-5p</p> <p>↓ hsa-miR-454-5p</p> | Inhibits translation. In ADHD, heterozygous pathogenic variant in <i>TNRC6B</i> have been found.                                                                                                                                                                                           | (38,39) |
| <i>AGO2</i>   | Argonaute RISC catalytic component 2       | <p>↑ hsa-miR-548d-5p</p> <p>↑ hsa-miR-548k</p> <p>↓ hsa-miR-625-5p</p>                          | It cleaves mRNA to regulate gene expression. Astrocytes exposed to A $\beta$ <sub>1-42</sub> oligomers show loss of Ago2 phosphorylation, which leads to uncontrolled production of pro-inflammatory cytokines and neuroinflammation, leading to loss of neurons.                          | (40,41) |
| <i>ATXN1L</i> | Ataxin 1 like                              | <p>↑ hsa-miR-548k</p> <p>↑ hsa-miR-877-5p</p>                                                   | <i>ATXN1</i> may help to shuttle <i>ATXN1L</i> into the nucleus where they interact in a large protein complex. Therefore, it is related to A $\beta$ pathology mediated by <i>BACE1</i> expression. Also related to progressive non-fluent aphasia.                                       | (42)    |

|               |                                                     |                                                                                                                         |                                                                                                                                                                                                                                                                                                                                                                                                                                                        |         |
|---------------|-----------------------------------------------------|-------------------------------------------------------------------------------------------------------------------------|--------------------------------------------------------------------------------------------------------------------------------------------------------------------------------------------------------------------------------------------------------------------------------------------------------------------------------------------------------------------------------------------------------------------------------------------------------|---------|
| <i>CSNK1E</i> | Casein kinase 1 epsilon                             | <p>↑ hsa-miR-221-5p</p> <p>↓ hsa-miR-382-5p</p>                                                                         | Involved in circadian rhythms during early AD development. The expression of <i>Csnk1E</i> was higher in AD mice compared to control mice after light induction.                                                                                                                                                                                                                                                                                       | (43)    |
| <i>ATXN1</i>  | Ataxin 1                                            | <p>↑ hsa-miR-877-5p</p> <p>↓ hsa-miR-625-5p</p> <p>↓ hsa-miR-224-5p</p> <p>↓ hsa-miR-454-5p</p> <p>↓ hsa-miR-382-5p</p> | Knockout of <i>Atxn1</i> increases <i>BACE1</i> levels and enhances amyloidogenic cleavage of APP, exacerbating A $\beta$ deposition and gliosis in AD mouse models, and impaired hippocampal neurogenesis and olfactory axonal targeting.                                                                                                                                                                                                             | (44)    |
| <i>GAB1</i>   | GRB2 associated binding protein 1                   | <p>↑ hsa-miR-548d-5p</p> <p>↑ hsa-miR-877-5p</p>                                                                        | Promotes hippocampal LTP. In AD patients and in a mouse model of AD it is decreased, inhibiting septal cholinergic neurons projecting to the hippocampus.                                                                                                                                                                                                                                                                                              | (45)    |
| <i>CRKL</i>   | CRK like proto-oncogene, adaptor protein            | <p>↑ hsa-miR-877-5p</p> <p>↓ hsa-miR-769-5p</p>                                                                         | Some of the neurotoxic effects of A $\beta$ peptides may be mediated via the activation of proteins belonging to the Abl family, that regulate actin cytoskeleton structure through <i>CRKL</i> and phosphorylate microtubule-associated Tau protein, thus weakening synaptic transmission.                                                                                                                                                            | (46)    |
| <i>NF2</i>    | Moesin-ezrin-radixin like (MERLIN) tumor suppressor | <p>↓ hsa-miR-769-5p</p> <p>↑ hsa-miR-221-5p</p>                                                                         | Loss of function of the gene lead to the development of schwannomas, meningiomas and juvenile cataracts.                                                                                                                                                                                                                                                                                                                                               | (47)    |
| <i>AKT1</i>   | AKT serine/threonine kinase 1                       | <p>↑ hsa-miR-548k</p> <p>↓ hsa-miR-382-5p</p>                                                                           | <p>The PI3K/Akt signaling pathway is anti-apoptotic, and <i>AKT1</i> inhibits Akt phosphorylation (activation), which in turn upregulates the activity of <i>GSK3<math>\beta</math></i>, a kinase implicated in the pathogenesis of AD.</p> <p>ROS-mediated oxidative modification of Akt1 leads to reduced synaptic Akt1-mTOR signaling which contributes to synaptic dysfunction in AD. It is rescued by overexpression of Akt1 in APP/PS1 mice.</p> | (48,49) |

|                 |                                                     |                                                                                                |                                                                                                                                                                                                                                                                                                                                                                                                                       |         |
|-----------------|-----------------------------------------------------|------------------------------------------------------------------------------------------------|-----------------------------------------------------------------------------------------------------------------------------------------------------------------------------------------------------------------------------------------------------------------------------------------------------------------------------------------------------------------------------------------------------------------------|---------|
| <i>HSP90AA1</i> | Heat shock protein 90 alpha family class A member 1 | <p>↑ hsa-miR-548d-5p</p> <p>↑ hsa-miR-548k</p> <p>↓ hsa-miR-625-5p</p> <p>↓ hsa-miR-224-5p</p> | <p>Regulates the stabilization and function of p-tau in AD. Inhibition of Hsp90 in AD mouse models reduced A<math>\beta</math> toxicity and normalizes synaptic function.</p> <p>In another study, <i>HSP90AA1</i> was decreased in the blood from MCI and AD and was negatively correlated with <math>\alpha</math> and <math>\beta</math> secretase activities.</p>                                                 | (50,51) |
| <i>RICTOR</i>   | RPTOR independent companion of MTOR complex 2       | <p>↓ hsa-miR-769-5p</p> <p>↓ hsa-miR-625-5p</p>                                                | <p>Regulates transcription of multiple genes involved in oxidative phosphorylation and other mitochondrial functions. Inhibits nuclear mitochondrial expression. It also controls the actin cytoskeleton polymerization.</p> <p>Some studies find it not altered in AD. Other studies find that Rictor conditional knockout impairs long-term memory and late long-term potentiation, involved in spatial memory.</p> | (52,53) |
| <i>CTNNB1</i>   | Catenin Beta 1                                      | <p>↑ hsa-miR-548d-5p</p> <p>↑ hsa-miR-548k</p>                                                 | <p>When the Wnt/<math>\beta</math>-catenin (<i>CTNNB1</i>) is activated, <math>\beta</math>-catenin facilitates gene transcription, while when this pathway is inactivated, <math>\beta</math>-catenin is degraded. Mutations of <i>CTNNB1</i> disturb synaptic plasticity, neuronal apoptosis, and neurogenesis.</p>                                                                                                 | (6,7)   |
| <i>OLA1</i>     | Obg like ATPase 1                                   | <p>↓ hsa-miR-769-5p</p> <p>↓ hsa-miR-382-5p</p>                                                | <p>Antioxidant suppressor. Downregulated <i>OLA1</i> preserves neuronal components.</p>                                                                                                                                                                                                                                                                                                                               | (54)    |
| <i>AP3S2</i>    | Adaptor related protein complex 3 subunit sigma 2   | <p>↑ hsa-miR-548d-5p</p> <p>↑ hsa-miR-548k</p> <p>↓ hsa-miR-769-5p</p>                         | <p>Encodes a protein involved in protein transport whose variants are associated with the risk of T2D (which is a risk factor for AD).</p>                                                                                                                                                                                                                                                                            | (55)    |

|                |                                                                              |                                                                             |                                                                                                                                                                                                                                                                                                    |         |
|----------------|------------------------------------------------------------------------------|-----------------------------------------------------------------------------|----------------------------------------------------------------------------------------------------------------------------------------------------------------------------------------------------------------------------------------------------------------------------------------------------|---------|
| <i>YWHAG</i>   | Tyrosine 3-monooxygenase/tryptophan 5-monooxygenase activation protein gamma | ↑ hsa-miR-548d-5p<br>↓ hsa-miR-224-5p<br>↓ hsa-miR-454-5p                   | Involved in signal transduction. Expression levels are increased in CSF specimens from AD patients and in the hippocampus of 5XFAD mice compared to controls. Recurrent distal deletion of <i>YWHAG</i> has been identified in patients with intellectual disability and neurobehavioral problems. | (56,57) |
| <i>MAPK1</i>   | Mitogen-activated protein kinase 1                                           | ↓ hsa-miR-769-5p<br>↓ hsa-miR-454-5p<br>↓ hsa-miR-382-5p                    | The AKT-MAPK1-MTORC1 pathways is activated in 5XFAD mice (which has A $\beta$ pathology). <i>MAPK1</i> phosphorylates the transcription factor EB, a master regulator of the autophagy-lysosomal pathway, thus inactivating it and promoting the development of AD.                                | (58)    |
| <i>NUDT21</i>  | Nudix hydrolase 21                                                           | ↑ hsa-miR-548k<br>↓ hsa-miR-625-5p<br>↓ hsa-miR-454-5p                      | Elevated <i>NUDT21</i> results in an enrichment of inefficiently translated long mRNA isoforms, which is associated with intellectual disability and neuropsychiatric disease.                                                                                                                     | (59,60) |
| <i>ARL6IP1</i> | ADP ribosylation factor like GTPase 6 interacting protein 1                  | ↑ hsa-miR-548d-5p<br>↑ hsa-miR-548k<br>↓ hsa-miR-224-5p<br>↓ hsa-miR-382-5p | Elevated in the brain of AD Tg2576 mice and AB <sub>1-42</sub> treated brain CECs. Promotes apoptosis through interaction with <i>ASK1</i> .                                                                                                                                                       | (61)    |

Abbreviations: *EPO*, Erythropoietin; ADHD, Attention deficit and hyperactivity disorder; LTP, Long-term potentiation; Abl, Abelson non-receptor tyrosine kinase; PNC, Peripheral nervous system; NSC, neural stem cells; CEC, Cerebral microvascular endothelial cells; *ASK1*, Apoptosis signal-regulating kinase 1.

**eTable 10** | Significantly enriched KEGG pathways for the ATN-related sncRNA signature.

| KEGG ID  | KEGG term                                                | Gene Set Size | Counts | Padj   | Genes                                                                                                                                                                                                                                                                                                                    |
|----------|----------------------------------------------------------|---------------|--------|--------|--------------------------------------------------------------------------------------------------------------------------------------------------------------------------------------------------------------------------------------------------------------------------------------------------------------------------|
| hsa05200 | MicroRNAs in cancer                                      | 150           | 44     | <0.001 | <i>ABCC1, ABL1, BAK1, BCL2L11, BCL2L2, BMI1, BRCA1, CASP3, CCND1, CCND2, CCNG1, CDCA5, CDK6, CDKN1A, COMMD3-BMI1, CRKL, CYP1B1, DICER1, FZD3, HDAC4, HOXD10, KRAS, MAP2K1, MDM4, MMP16, MTOR, NFKB1, NOTCH1, PDGFRA, PDGFRB, PLCG2, PRKCA, PTEN, RHOA, SHC4, SLC7A1, SOS1, SOS2, STAT3, TGFB2, TNC, TP63, ZEB1, ZEB2</i> |
| hsa04722 | Neurotrophin signaling pathway                           | 119           | 27     | 0.029  | <i>ABL1, AKT3, ARHGDI1, CALM1, CALML4, CAMK4, CRKL, GAB1, IRAK1, IRAK4, KRAS, MAP2K1, NFKB1, NTF3, NTRK2, PDPK1, PLCG2, RAP1A, RAP1B, RAPGEF1, RHOA, SHC4, SORT1, SOS1, SOS2, TRAF6, YWHAE, NOTCH1, PDGFRA, PDGFRB, PLCG2, PRKCA, PTEN, RHOA, SHC4, SLC7A1, SOS1, SOS2, STAT3, TGFB2, TNC, TP63, ZEB1, ZEB2</i>          |
| hsa04550 | Signaling pathways regulating pluripotency of stem cells | 139           | 31     | 0.021  | <i>ACVR1B, AKT3, BMI1, BMPR1A, COMMD3-BMI1, DLX5, DVL1, FZD1, FZD10, FZD2, FZD3, FZD5, FZD7, ID4, IGF1, IL6ST, JARID2, KAT6A, KRAS, MAP2K1, MEIS1, NEUROG1, PCGF5, SKIL, SMAD1, SMAD3, SMAD5, STAT3, WNT16, WNT5A, WNT9B, PRKCA, PTEN, RHOA,</i>                                                                         |

|          |                                |     |    |       |                                                                                                                                                                                                                                                                                                                    |
|----------|--------------------------------|-----|----|-------|--------------------------------------------------------------------------------------------------------------------------------------------------------------------------------------------------------------------------------------------------------------------------------------------------------------------|
|          |                                |     |    |       | <i>SHC4, SLC7A1, SOS1, SOS2, STAT3, TGFB2, TNC, TP63, ZEB1, ZEB2</i>                                                                                                                                                                                                                                               |
| hsa04390 | Hippo signaling pathway        | 154 | 34 | 0.019 | <i>ACTG1, BMP2, BMP8B, BMPR1A, CCND1, CCND2, CSNK1D, CTNNA3, DVL1, FZD1, FZD10, FZD2, FZD3, FZD5, FZD7, LIMD1, MPP5, NF2, PARD6B, PRKCZ, SMAD1, SMAD3, TEAD1, TGFB2, TGFB1, WNT16, WNT5A, WNT9B, WWTR1, YAP1, YWHAB, YWHAE, YWHAQ, YWHAZ, SHC4, SLC7A1, SOS1, SOS2, STAT3, TGFB2, TNC, TP63, ZEB1, ZEB2</i>        |
| hsa04120 | Ubiquitin mediated proteolysis | 136 | 29 | 0.041 | <i>BRCA1, CBL, CBLB, CUL3, CUL4A, HERC2, KLHL13, KLHL9, NEDD4L, PIAS2, RHOBTB1, SKP1, SMURF2, TRAF6, UBE2A, UBE2B, UBE2E1, UBE2E3, UBE2G1, UBE2H, UBE2J1, UBE2K, UBE2QL1, UBE3A, UBE4A, UBR5, VHL, WWP1, XIAP, YAP1, YWHAB, YWHAE, YWHAQ, YWHAZ, SHC4, SLC7A1, SOS1, SOS2, STAT3, TGFB2, TNC, TP63, ZEB1, ZEB2</i> |
| hsa05205 | Proteoglycans in cancer        | 198 | 42 | 0.014 | <i>ACTG1, AKT3, CASP3, CBL, CCND1, CDKN1A, CTTN, DDX5, ERBB4, FZD1, FZD10, FZD2, FZD3, FZD5, FZD7, GAB1, GPC1, HOXD10, IGF1, ITGAV, ITGB1, ITPR1, KRAS, MAP2K1, MSN, MTOR, PDPK1, PLCG2, PRKCA, RHOA, RRAS2, SDC2, SDC4, SOS1, SOS2, STAT3, TGFB2, TIAM1, TLR4, WNT16, WNT5A, WNT9B, ZEB1, ZEB2</i>                |

|               |                                             |     |    |       |                                                                                                                                                                                                                                                                                                                                        |
|---------------|---------------------------------------------|-----|----|-------|----------------------------------------------------------------------------------------------------------------------------------------------------------------------------------------------------------------------------------------------------------------------------------------------------------------------------------------|
| hsa05202      | Transcriptional misregulation in cancer     | 186 | 39 | 0.019 | <i>BAK1, BCL11B, BCL6, BMI1, CCND2, CCNT1, CDK14, CDKN1A, COMMMD3-BMI1, DDX5, ELK4, EWSR1, HDAC2, HIST1H3F, HIST1H3G, IGF1, IL6, KLF3, KMT2A, MEF2C, MEIS1, MLLT1, MYCN, NCOR1, NFKB1, NSD2, PAX5, POLK, RUNX1T1, RUNX2, RXRA, SIN3A, SMAD1, SP1, SPI1, SS18, TLX3, WNT16, ZEB1, WNT16, WNT5A, WNT9B, ZEB1, ZEB2</i>                   |
| hsa05414<br>1 | Protein processing in endoplasmic reticulum | 165 | 34 | 0.037 | <i>ATXN3, BAG2, BAK1, CKAP4, DAD1, DDOST, DNAJC10, DNAJC3, EDEM3, EIF2AK3, ERLEC1, ERO1A, HERPUD1, HSP90AA1, HSPA1B, HYOU1, MARCH6, NFE2L2, NSFL1C, P4HB, SAR1A, SAR1B, SEC62, SEC63, SKP1, SSR2, STT3A, TUSC3, UBE2G1, UBE2J1, UBQLN2, UGGT1, XBP1, YOD1, SPI1, SS18, TLX3, WNT16, ZEB1, WNT16, WNT5A, WNT9B, ZEB1, ZEB2</i>          |
| hsa04010      | MAPK signaling pathway                      | 295 | 55 | 0.025 | <i>AKT3, ANGPT4, ATF2, CACNA2D3, CASP3, CRKL, DUSP7, EFNA5, ELK4, ERBB4, FGF7, GNG12, HSPA1B, IGF1, IL1B, IL1RAP, IRAK1, IRAK4, KIT, KITLG, KRAS, MAP2K1, MAP3K2, MAP4K3, MAP4K4, MAPK8IP1, MAPKAPK5, MECOM, MEF2C, NFATC1, NFATC3, NFKB1, NTF3, NTRK2, PDGFRA, PDGFRB, PLA2G4A, PPM1A, PPP3CA, PPP3CB, PRKCA, PTPRR, RAP1A, RAP1B</i> |
| hsa05200      | Pathways in cancer                          | 524 | 97 | 0.001 | <i>ABL1, ADCY2, AKT3, APPL1, AR, BAK1, BCL2L11, BMP2, CALM1, CALML4, CASP3, CBL, CCDC6, CCND1, CCND2,</i>                                                                                                                                                                                                                              |

*CDK6, CDKN1A, COL4A1, CRKL, CTBP2, CTNNA3, DLL1,  
DVL1, F2R, F2RL3, FGF7, FZD1, FZD10, FZD2, FZD3, FZD5,  
FZD7, GNA13, GNG12, GSTA1, GSTM2, HDAC2, HHIP,  
HSP90AA1, IFNA21, IFNA4, IGF1, IL23A, IL6*

---



**eTable 11** | Significantly enriched KEGG pathways for the AD-related sncRNA signature.

| KEGG ID  | KEGG term                                                 | Gene Set Size | Counts | Padj   | Genes                                                                                                                                                                                                                                                                                                                                                                                                                                                                                       |
|----------|-----------------------------------------------------------|---------------|--------|--------|---------------------------------------------------------------------------------------------------------------------------------------------------------------------------------------------------------------------------------------------------------------------------------------------------------------------------------------------------------------------------------------------------------------------------------------------------------------------------------------------|
| hsa05206 | MicroRNA in cancer                                        | 150           | 67     | <0.001 | <i>ABCC1, ABL1, ATM, BAK1, BCL2, BCL2L2, BMF, BMI1, BMPR2, BRCA1, CASP3, CCND1, CCND2, CCNG1, CD44, CDC25C, CDCA5, CDK6, CDKN1B, COMMD3-BMI1, CREBBP, CRKL, CYP1B1, DDIT4, DICER1, DNMT3B, EFNA3, ERBB2, FZD3, HDAC4, HNRNPK, HOXD10, IGF2BP1, IRS1, KRAS, MAP2K1, MAP2K2, MAPK1, MARCKS, MCL1, MDM4, MMP16, MTOR, NFKB1, NOTCH1, NOTCH2, PDCD4, PDGFB, PDGFRA, PDGFRB, PLCG2, PRKCA, PTEN, RPS6KA5, SHC4, SIRT1, SLC7A1, SOS1, SOS2, STAT3, TGFB2, TNC, TP63, TPM1, TRIM71, ZEB1, ZEB2</i> |
| hsa03015 | mRNA surveillance pathway                                 | 91            | 38     | <0.001 | <i>ACIN1, BCL2L2-PABPN1, CASC3, CPSF2, CPSF6, CPSF7, CSTF2, CSTF2T, ETF1, GSPT1, GSPT2, MSI2, NCBP2, NUDT21, NXF1, PABPC1, PABPC1L2A, PABPC1L2B, PABPC4, PABPC5, PABPN1, PAPOLA, PAPOLG, PNN, PPP1CA, PPP2CA, PPP2R1A, PPP2R2C, PPP2R2D, RBM8A, SAP18, SMG1, SMG5, SRRM1, UPF2, UPF3B, WDR33, WDR82</i>                                                                                                                                                                                     |
| hsa04550 | Signalling pathways regulating pluripotency of stem cells | 139           | 58     | <0.001 | <i>ACVR1B, ACVR2A, ACVR2B, AKT2, AKT3, AXIN2, BMI1, BMPR2, COMMD3-BMI1, DLX5, DUSP9, DVL3, FZD10, FZD2, FZD3, FZD5, FZD6, FZD7, GSK3B, HAND1, IGF1, IGF1R, IL6ST, INHBA, INHBC, ISL1, JAK3, JARID2, KAT6A, KLF4, KRAS, LEFTY2, MAP2K1, MAP2K2, MAPK1, MEIS1, NEUROG1, OTX1, PAX6, PCGF3, PCGF5, PIK3CB, PIK3R3, REST, RIF1, SKIL, SMAD2, SMAD3, SMAD4, SMAD5, SMAD9, SOX2, STAT3, TBX3, WNT16, WNT5A, WNT7B, WNT9B</i>                                                                      |

|          |                                             |     |    |        |                                                                                                                                                                                                                                                                                                                                                                                                                                        |
|----------|---------------------------------------------|-----|----|--------|----------------------------------------------------------------------------------------------------------------------------------------------------------------------------------------------------------------------------------------------------------------------------------------------------------------------------------------------------------------------------------------------------------------------------------------|
| hsa04390 | Hippo signaling pathway                     | 154 | 57 | <0.001 | ACTB, ACTG1, AMOT, AXIN2, BBC3, BMP8B, BMPR2, CCND1, CCND2, CDH1, CSNK1D, CTNNA3, DVL3, FZD10, FZD2, FZD3, FZD5, FZD6, FZD7, GDF6, GSK3B, LATS1, LATS2, LEF1, LIMD1, MOB1A, MOB1B, NKD1, PARD3, PARD6B, PPP1CA, PPP2CA, PPP2R1A, PPP2R2C, PPP2R2D, PRKCI, PRKCZ, SERPINE1, SMAD2, SMAD3, SMAD4, SOX2, TCF7L2, TEAD1, TGFB2, TGFB1, TP73, WNT16, WNT5A, WNT7B, WNT9B, WWTR1, YAP1, YWHAE, YWHAG, YWHAQ, YWHAZ                           |
| hsa04218 | Cellular senescence                         | 160 | 59 | <0.001 | AKT2, AKT3, ATM, CACNA1D, CALM1, CALML3, CALML4, CAPN2, CCNB1, CCND1, CCND2, CDK1, CDK4, CDK6, CHEK2, ETS1, FOXM1, HIPK1, HIPK2, HIPK3, HLA-A, HLA-G, ITPR1, KRAS, MAP2K1, MAP2K2, MAPK1, MTOR, NBN, NFATC1, NFATC3, NFKB1, PIK3CB, PIK3R3, PPP1CA, PPP3CA, PPP3CB, PPP3R1, PTEN, RAD1, RASSF5, RBL2, RELA, RRAS2, SERPINE1, SIRT1, SLC25A5, SMAD2, SMAD3, SQSTM1, TGFB2, TGFB1, TRAF3IP2, TRPM7, TSC1, VDAC1, VDAC2, ZFP36L1, ZFP36L2 |
| hsa04141 | Protein processing in endoplasmic reticulum | 165 | 56 | 0.002  | ATXN3, BAK1, BCAP31, BCL2, CALR, CAPN2, DAD1, DDIT3, DDOST, DERL1, DNAJC10, DNAJC3, EDEM3, EIF2AK2, EIF2AK3, ERO1A, GANAB, HERPUD1, HSP90AA1, HSPA8, HSPH1, HYOU1, MAN1A1, MAN1A2, MAPK8, MAPK9, MARCH6, NFE2L2, NSFL1C, P4HB, SAR1A, SAR1B, SEC23A, SEC24A, SEC24C, SEC62, SEC63, SEL1L, SKP1, SSR1, SSR3, STT3A, SVIP, SYVN1, TRAM1, TUSC3, UBE2D1, UBE2D2, UBE2D3, UBE2G1, UBE2J1, UBQLN2, UBQLN4, UGGT1, XBP1, YOD1                |
| hsa04120 | Ubiquitin mediated proteolysis              | 136 | 46 | <0.011 | ANAPC1, BRCA1, CBL, CBLB, CDC27, CUL4A, CUL5, DDB1, FBXW8, HERC2, HERC4, HUWE1, KLHL13, KLHL9, NEDD4L, PIAS1, PIAS2, PIAS3, RHOTB1, SIAH1, SKP1, SMURF2, SYVN1, TRIM37, UBA6, UBE2A, UBE2B, UBE2D1, UBE2D2, UBE2D3, UBE2E1, UBE2F, UBE2G1, UBE2H, UBE2J1, UBE2K, UBE2N, UBE2QL1, UBE2R2, UBE2Z, UBE4A, UBOX5, UBR5, VHL, WWP1, XIAP                                                                                                    |

|          |                                         |     |    |        |                                                                                                                                                                                                                                                                                                                                                                                                                                                                                                                                                                                                                                                                                   |
|----------|-----------------------------------------|-----|----|--------|-----------------------------------------------------------------------------------------------------------------------------------------------------------------------------------------------------------------------------------------------------------------------------------------------------------------------------------------------------------------------------------------------------------------------------------------------------------------------------------------------------------------------------------------------------------------------------------------------------------------------------------------------------------------------------------|
| hsa05202 | Transcriptional misregulation in cancer | 186 | 62 | <0.001 | <i>AFF1, ATM, BAK1, BCL11B, BMI1, CCND2, CCNT1, CCNT2, CD40, CDKN1B, COMMD3-BMI1, DDIT3, DDX5, ELK4, ETV1, ETV6, EWSR1, EYA1, FEV, FLI1, H3F3B, HDAC2, HIST1H3B, HIST1H3F, HIST1H3G, HOXA10, HPGD, IGF1, IGF1R, KLF3, KMT2A, MAF, MEF2C, MEIS1, MEN1, MITF, MLLT1, MLLT3, MYCN, NCOR1, NFKB1, PAX5, PAX7, PLAT, POLK, PPARG, PRCC, PROM1, RELA, RUNX1, RUNX2, RXRA, SIN3A, SIX4, SP1, SS18, SUPT3H, TFE3, TLX3, TRAF1, WNT16, ZEB1</i>                                                                                                                                                                                                                                            |
| hsa04010 | MAPK signaling pathway                  | 295 | 91 | <0.001 | <i>AKT2, AKT3, ANGPT2, ANGPT4, ARRB1, CACNA1D, CACNA1E, CACNA2D3, CACNB1, CACNB4, CACNG7, CASP3, CDC42, CHUK, CRKL, DDIT3, DUSP10, DUSP7, DUSP8, DUSP9, EFNA3, EFNA5, ELK1, ELK4, ERBB2, ERBB4, EREG, FAS, FGF7, GNG12, HSPA8, IGF1, IGF1R, IGF2, IL1B, IRAK4, JUND, KIT, KITLG, KRAS, MAP2K1, MAP2K2, MAP2K4, MAP3K2, MAP4K3, MAP4K4, MAPK1, MAPK8, MAPK8IP1, MAPK9, MAPKAPK5, MAPT, MECOM, MEF2C, MKNK2, NF1, NFATC1, NFATC3, NFKB1, NLK, NTF3, NTRK2, PAK2, PDGFB, PDGFRA, PDGFRB, PPM1A, PPP3CA, PPP3CB, PPP3R1, PPP5C, PRKACA, PRKCA, PTPRR, RAC1, RAP1A, RAP1B, RASA2, RASGRF1, RASGRP1, RELA, RPS6KA4, RPS6KA5, RPS6KA6, RRAS2, SOS1, SOS2, TAOK1, TAOK2, TGFB2, TGFB1</i> |

|          |                    |     |     |        |                                                                                                                                                                                                                                                                                                                                                                                                                                                                                                                                                                                                                                                                                                                                                                                                                                                                                                                                                                                                                                                                                               |
|----------|--------------------|-----|-----|--------|-----------------------------------------------------------------------------------------------------------------------------------------------------------------------------------------------------------------------------------------------------------------------------------------------------------------------------------------------------------------------------------------------------------------------------------------------------------------------------------------------------------------------------------------------------------------------------------------------------------------------------------------------------------------------------------------------------------------------------------------------------------------------------------------------------------------------------------------------------------------------------------------------------------------------------------------------------------------------------------------------------------------------------------------------------------------------------------------------|
| hsa05200 | Pathways in cancer | 524 | 153 | <0.001 | <p><i>ABL1, ADCY2, ADCY3, AGTR1, AKT2, AKT3, APPL1, AR, AXIN2, BAK1, BBC3, BCL2, CALM1, CALML3, CALML4, CAMK2A, CASP3, CASP7, CBL, CCND1, CCND2, CDC42, CDH1, CDK4, CDK6, CDKN1B, CHUK, COL4A1, COL4A3, CREBBP, CRKL, CSF2RB, CTNNA3, CXCR4, DVL3, EDNRA, EGLN1, ELK1, EPO, ERBB2, ESR1, ETS1, F2RL3, FAS, FGF7, FZD10, FZD2, FZD3, FZD5, FZD6, FZD7, GNA13, GNAI1, GNAI2, GNAQ, GNB4, GNG11, GNG12, GNG7, GSK3B, GSTA1, GSTM2, GSTM3, HDAC2, HEY1, HEYL, HSP90AA1, IFNA21, IFNGR2, IGF1, IGF1R, IGF2, IL12RB2, IL13RA1, IL23A, IL5, IL6R, IL6ST, IL7R, ITGA6, ITGAV, ITGB1, JAK3, KIT, KITLG, KRAS, LAMC1, LEF1, LPAR1, MAP2K1, MAP2K2, MAPK1, MAPK8, MAPK9, MECOM, MITF, MTOR, NCOA3, NFE2L2, NFKB1, NOS2, NOTCH1, NOTCH2, NQO1, PDGFB, PDGFRA, PDGFRB, PIK3CB, PIK3R3, PLCB1, PLCB4, PLCG2, POLK, PPARG, PRKACA, PRKCA, PTEN, PTGER3, RAC1, RAD51, RALA, RALBP1, RASGRP1, RASSF5, RELA, RPS6KA5, RPS6KB1, RUNX1, RXRA, SKP1, SMAD2, SMAD3, SMAD4, SOS1, SOS2, SP1, STAT1, STAT2, STAT3, SUFU, TCF7L2, TGFB2, TGFB1, TPM3, TPR, TRAF1, TRAF4, VHL, WNT16, WNT5A, WNT7B, WNT9B, XIAP</i></p> |
|----------|--------------------|-----|-----|--------|-----------------------------------------------------------------------------------------------------------------------------------------------------------------------------------------------------------------------------------------------------------------------------------------------------------------------------------------------------------------------------------------------------------------------------------------------------------------------------------------------------------------------------------------------------------------------------------------------------------------------------------------------------------------------------------------------------------------------------------------------------------------------------------------------------------------------------------------------------------------------------------------------------------------------------------------------------------------------------------------------------------------------------------------------------------------------------------------------|

---

**eTable 12** | Significantly enriched GO terms in the ATN-related sncRNA signature.

| GO ID                     | GO Term                                                                 | Gene Set Size | Counts | Padj   |
|---------------------------|-------------------------------------------------------------------------|---------------|--------|--------|
| <b>Biological process</b> |                                                                         |               |        |        |
| GO: 0022008               | Neurogenesis                                                            | 1551          | 264    | <0.001 |
| GO: 0033554               | Cellular response to stress                                             | 1867          | 311    | <0.001 |
| GO: 0010629               | Negative regulation of gene expression                                  | 1733          | 285    | <0.001 |
| GO: 0070727               | Cellular macromolecule localization                                     | 1825          | 296    | <0.001 |
| GO: 0045935               | Positive regulation of nucleobase-containing compound metabolic process | 1847          | 298    | <0.001 |
| GO: 0009719               | Response to endogenous stimulus                                         | 1595          | 253    | <0.001 |
| GO: 0007267               | Cell-cell signaling                                                     | 1575          | 249    | <0.001 |
| GO: 0051049               | Regulation of transport                                                 | 1765          | 276    | <0.001 |
| GO: 0006928               | Movement of cell or subcellular component                               | 1967          | 299    | <0.001 |
| GO: 0009888               | Tissue development                                                      | 1925          | 288    | <0.001 |
| <b>Molecular function</b> |                                                                         |               |        |        |
| GO: 0019904               | Protein domain specific binding                                         | 684           | 142    | <0.001 |
| GO: 0019787               | Ubiquitin-like protein transferase activity                             | 416           | 79     | <0.001 |
| GO: 0019900               | Kinase binding                                                          | 711           | 124    | <0.001 |
| GO: 0008134               | Transcription factor binding                                            | 638           | 111    | <0.001 |
| GO: 0003700               | DNA-binding transcription factor activity                               | 1700          | 269    | <0.001 |
| GO: 0051020               | GTPase binding                                                          | 646           | 102    | 0.008  |
| GO: 0003723               | RNA binding                                                             | 1603          | 248    | <0.001 |
| GO: 0008092               | Cytoskeletal protein binding                                            | 940           | 140    | 0.009  |
| GO: 0046914               | Transition metal ion binding                                            | 1058          | 153    | 0.016  |
| GO: 0017076               | Purine nucleotide binding                                               | 1865          | 261    | 0.002  |
| <b>Cellular component</b> |                                                                         |               |        |        |
| GO: 0030054               | Cell junction                                                           | 1268          | 220    | <0.001 |
| GO: 0044451               | Nucleoplasm part                                                        | 1087          | 178    | <0.001 |
| GO: 0005694               | Chromosome                                                              | 1014          | 162    | <0.001 |
| GO: 0097458               | Neuron part                                                             | 1690          | 269    | <0.001 |
| GO: 0005730               | Nucleolus                                                               | 939           | 144    | <0.001 |
| GO: 1902494               | Catalytic complex                                                       | 1346          | 202    | <0.001 |
| GO: 0005794               | Golgi apparatus                                                         | 1516          | 226    | <0.001 |
| GO: 0098805               | Whole membrane                                                          | 1630          | 229    | <0.001 |
| GO: 0005783               | Endoplasmic reticulum                                                   | 1861          | 250    | <0.001 |
| GO: 0005887               | Integral component of plasma membrane                                   | 1596          | 213    | <0.001 |

Abbreviations: GO, Gene ontology.

**eTable 13** | Significantly enriched GO terms in the AD-related sncRNA signature.

| GO ID                     | GO Term                                                      | Gene Set Size | Counts | Padj   |
|---------------------------|--------------------------------------------------------------|---------------|--------|--------|
| <b>Biological process</b> |                                                              |               |        |        |
| GO: 0010629               | Negative regulation of gene expression                       | 1733          | 546    | <0.001 |
| GO: 0022008               | Neurogenesis                                                 | 1551          | 462    | <0.001 |
| GO: 0070647               | Protein modification by small protein conjugation or removal | 1028          | 303    | <0.001 |
| GO: 0009719               | Response to endogenous stimulus                              | 1595          | 470    | <0.001 |
| GO: 0070727               | Cellular macromolecule localization                          | 1825          | 533    | <0.001 |
| GO: 2000026               | Regulation of multicellular organismal development           | 1908          | 552    | <0.001 |
| GO: 0009891               | Positive regulation of biosynthetic process                  | 1949          | 557    | <0.001 |
| GO: 0046907               | Intracellular transport                                      | 1803          | 508    | <0.001 |
| GO: 0033554               | Cellular response to stress                                  | 1867          | 520    | <0.001 |
| GO: 0008283               | Cell proliferation                                           | 1986          | 537    | <0.001 |
| <b>Molecular function</b> |                                                              |               |        |        |
| GO: 0019787               | Ubiquitin-like protein transferase activity                  | 416           | 139    | <0.001 |
| GO: 0019904               | Protein domain specific binding                              | 684           | 217    | <0.001 |
| GO: 0019901               | Protein kinase binding                                       | 631           | 187    | <0.001 |
| GO: 0003700               | DNA-binding transcription factor activity                    | 1700          | 500    | <0.001 |
| GO: 0003723               | RNA binding                                                  | 1603          | 449    | <0.001 |
| GO: 0051020               | GTPase binding                                               | 646           | 169    | <0.001 |
| GO: 0032553               | Ribonucleotide binding                                       | 1865          | 466    | <0.001 |
| GO: 0046914               | Transition metal ion binding                                 | 1058          | 264    | <0.001 |
| GO: 0042802               | Identical protein binding                                    | 1696          | 413    | <0.001 |
| GO: 0005102               | Signalling receptor binding                                  | 1538          | 363    | <0.001 |
| <b>Cellular component</b> |                                                              |               |        |        |
| GO: 0044451               | Nucleoplasm part                                             | 1087          | 329    | <0.001 |
| GO: 0097458               | Neuron part                                                  | 1690          | 479    | <0.001 |
| GO: 0005694               | Chromosome                                                   | 1014          | 278    | <0.001 |
| GO: 0005730               | Nucleolus                                                    | 939           | 255    | <0.001 |
| GO: 1902494               | Catalytic complex                                            | 1346          | 365    | <0.001 |
| GO: 0005794               | Golgi apparatus                                              | 1516          | 403    | <0.001 |
| GO: 0098805               | Whole membrane                                               | 1630          | 416    | <0.001 |
| GO: 0005783               | Endoplasmic reticulum                                        | 1861          | 454    | <0.001 |
| GO: 0031226               | Intrinsic component of plasma membrane                       | 1673          | 381    | <0.001 |
| GO: 0044430               | Cytoskeletal part                                            | 1620          | 364    | <0.001 |

Abbreviations: GO, Gene Ontology.

## REFERENCES

1. EMBL-EBII. Ensembl ([https://www.ensembl.org/Homo\\_sapiens/Info/Index](https://www.ensembl.org/Homo_sapiens/Info/Index)). 2023.
2. MiRBase. miRBase (<https://www.mirbase.org/ftp.shtml>). 2019.
3. Wang Lab PNGCU of P. DASHR (<https://dashr2.lisanwanglab.org/download.php>).
4. Zhang X, Zou M, Wu Y, Jiang D, Wu T, Zhao Y, et al. Regulation of the Late Onset alzheimer's Disease Associated HLA-DQA1/DRB1 Expression. *Am J Alzheimers Dis Other Demen*. 2022 Jan 26;37:153331752210850.
5. Dharshini SAP, Taguchi Y h., Gromiha MM. Investigating the energy crisis in Alzheimer disease using transcriptome study. *Sci Rep*. 2019 Dec 6;9(1):18509.
6. Keshavarzi M, Moradbeygi F, Mobini K, Ghaffarian Bahraman A, Mohammadi P, Ghaedi A, et al. The interplay of aryl hydrocarbon receptor/WNT/CTNNB1/Notch signaling pathways regulate amyloid beta precursor mRNA/protein expression and effected the learning and memory of mice. *Toxicol Res (Camb)*. 2022 Feb 26;11(1):147–61.
7. Zhuang W, Ye T, Wang W, Song W, Tan T. CTNNB1 in neurodevelopmental disorders. *Front Psychiatry*. 2023 Mar 16;14.
8. Chauderlier A, Gilles M, Spolcova A, Caillierez R, Chwastyniak M, Kress M, et al. Tau/DDX6 interaction increases microRNA activity. *Biochimica et Biophysica Acta (BBA) - Gene Regulatory Mechanisms*. 2018 Aug;1861(8):762–72.
9. Park H, Yang J, Kim R, Li Y, Lee Y, Lee C, et al. Mice lacking the PSD-95–interacting E3 ligase, Dorfin/Rnf19a, display reduced adult neurogenesis, enhanced long-term potentiation and impaired contextual fear conditioning. *Sci Rep*. 2015 Nov 10;5(1):16410.
10. Chen X, Chanda A, Ikeuchi Y, Zhang X, Goodman J V., Reddy NC, et al. The Transcriptional Regulator SnoN Promotes the Proliferation of Cerebellar Granule Neuron Precursors in the Postnatal Mouse Brain. *The Journal of Neuroscience*. 2019 Jan 2;39(1):44–62.
11. Bonni S, Bonni A. SnoN signaling in proliferating cells and postmitotic neurons. *FEBS Lett*. 2012 Jul 4;586(14):1977–83.
12. Altenhofen D, Khuong JMA, Kuhn T, Lebek S, Görigk S, Kaiser K, et al. E96V Mutation in the Kdelr3 Gene Is Associated with Type 2 Diabetes Susceptibility in Obese NZO Mice. *Int J Mol Sci*. 2023 Jan 3;24(1):845.

13. Griciuc A, Patel S, Federico AN, Choi SH, Innes BJ, Oram MK, et al. TREM2 Acts Downstream of CD33 in Modulating Microglial Pathology in Alzheimer's Disease. *Neuron*. 2019 Sep;103(5):820-835.e7.
14. Griciuc A, Serrano-Pozo A, Parrado AR, Lesinski AN, Asselin CN, Mullin K, et al. Alzheimer's Disease Risk Gene CD33 Inhibits Microglial Uptake of Amyloid Beta. *Neuron*. 2013 May;78(4):631–43.
15. Komuro R, Honda Y, Yanaizu M, Nagahama M, Kino Y. Alzheimer's Disease-Associated Alternative Splicing of CD33 Is Regulated by the HNRNPA Family Proteins. *Cells*. 2023 Feb 13;12(4):602.
16. Wang Q, Li WX, Dai SX, Guo YC, Han FF, Zheng JJ, et al. Meta-Analysis of Parkinson's Disease and Alzheimer's Disease Revealed Commonly Impaired Pathways and Dysregulation of NRF2-Dependent Genes. *Journal of Alzheimer's Disease*. 2017 Feb 20;56(4):1525–39.
17. Liu D, Dai SX, He K, Li GH, Liu J, Liu LG, et al. Identification of hub ubiquitin ligase genes affecting Alzheimer's disease by analyzing transcriptome data from multiple brain regions. *Sci Prog*. 2021 Jan 23;104(1):003685042110011.
18. Brionne TC, Tessier I, Masliah E, Wyss-Coray T. Loss of TGF- $\beta$ 1 Leads to Increased Neuronal Cell Death and Microgliosis in Mouse Brain. *Neuron*. 2003 Dec;40(6):1133–45.
19. Chou PY, Lin SR, Lee MH, Schultz L, Sze CI, Chang NS. A p53/TIAF1/WWOX triad exerts cancer suppression but may cause brain protein aggregation due to p53/WWOX functional antagonism. *Cell Communication and Signaling*. 2019 Dec 17;17(1):76.
20. Gamarra D, Elcoroaristizabal X, Fernández-Martínez M, de Pancorbo MM. Association of the C47T Polymorphism in SOD2 with Amnesic Mild Cognitive Impairment and Alzheimer's Disease in Carriers of the APOE $\epsilon$ 4 Allele. *Dis Markers*. 2015;2015:1–7.
21. Peculis R, Konrade I, Skapare E, Fridmanis D, Nikitina-Zake L, Lejnicks A, et al. Identification of glyoxalase 1 polymorphisms associated with enzyme activity. *Gene*. 2013 Feb;515(1):140–3.
22. Cáceres A, González JR. When pitch adds to volume: coregulation of transcript diversity predicts gene function. *BMC Genomics*. 2018 Dec 13;19(1):926.
23. Krausová M, Kreplová M, Banik P, Cvačková Z, Kubovčíak J, Modrák M, et al. Retinitis pigmentosa–associated mutations in mouse Prpf8 cause misexpression of circRNAs and degeneration of cerebellar granule cells. *Life Sci Alliance*. 2023 Jun 5;6(6):e202201855.



24. Lau SF, Cao H, Fu AKY, Ip NY. Single-nucleus transcriptome analysis reveals dysregulation of angiogenic endothelial cells and neuroprotective glia in Alzheimer's disease. *Proceedings of the National Academy of Sciences*. 2020 Oct 13;117(41):25800–9.
25. Lee H, Brott BK, Kirkby LA, Adelson JD, Cheng S, Feller MB, et al. Synapse elimination and learning rules co-regulated by MHC class I H2-Db. *Nature*. 2014 May 8;509(7499):195–200.
26. Huang YM, Ma YH, Gao PY, Wang ZB, Huang LY, Hou JH, et al. Plasma  $\beta$ 2-microglobulin and cerebrospinal fluid biomarkers of Alzheimer's disease pathology in cognitively intact older adults: the CABLE study. *Alzheimers Res Ther*. 2023 Apr 1;15(1):69.
27. Smith LK, He Y, Park JS, Bieri G, Snethlage CE, Lin K, et al.  $\beta$ 2-microglobulin is a systemic pro-aging factor that impairs cognitive function and neurogenesis. *Nat Med*. 2015 Aug 6;21(8):932–7.
28. Butterfield DA, Hardas SS, Lange MLB. Oxidatively Modified Glyceraldehyde-3-Phosphate Dehydrogenase (GAPDH) and Alzheimer's Disease: Many Pathways to Neurodegeneration. *Journal of Alzheimer's Disease*. 2010 Apr 1;20(2):369–93.
29. Tsai CW, Tsai CF, Lin KH, Chen WJ, Lin MS, Hsieh CC, et al. An investigation of the correlation between the S-glutathionylated GAPDH levels in blood and Alzheimer's disease progression. *PLoS One*. 2020 May 29;15(5):e0233289.
30. El Kadmiri N, Slassi I, El Moutawakil B, Nadifi S, Tadevosyan A, Hachem A, et al. Glyceraldehyde-3-phosphate dehydrogenase (GAPDH) and Alzheimer's disease. *Pathologie Biologie*. 2014 Dec;62(6):333–6.
31. Sunaga K, Takahashi H, Chuang DM, Ishitani R. Glyceraldehyde-3-phosphate dehydrogenase is over-expressed during apoptotic death of neuronal cultures and is recognized by a monoclonal antibody against amyloid plaques from Alzheimer's brain. *Neurosci Lett*. 1995 Nov;200(2):133–6.
32. Wouters R, Michiels C, Sannerud R, Kleizen B, Dillen K, Vermeire W, et al. Assembly of  $\gamma$ -secretase occurs through stable dimers after exit from the endoplasmic reticulum. *Journal of Cell Biology*. 2021 Sep 6;220(9).
33. Wu C, Xu G, Bao G, Gao H, Chen J, Zhang J, et al. Ubiquitin ligase Triad1 promotes neurite outgrowth by inhibiting MDM2-mediated ubiquitination of the neuroprotective factor pleiotrophin. *Journal of Biological Chemistry*. 2022 Oct;298(10):102443.

34. Li J, Chen F, Zhang Q, Meng X, Yao X, Risacher SL, et al. Genome-wide Network-assisted Association and Enrichment Study of Amyloid Imaging Phenotype in Alzheimer's Disease. *Curr Alzheimer Res*. 2020 Jan 10;16(13):1163–74.
35. Zhang X, Zou M, Wu Y, Jiang D, Wu T, Zhao Y, et al. Regulation of the Late Onset alzheimer's Disease Associated *HLA-DQA1/DRB1* Expression. *Am J Alzheimers Dis Other Demen*. 2022 Jan 26;37:153331752210850.
36. Nawalpuri B, Sharma A, Chattarji S, Muddashetty RS. Distinct temporal expression of the GW182 paralog *TNRC6A* in neurons regulates dendritic arborization. *J Cell Sci*. 2021 Aug 15;134(16).
37. Cristante E, Liyanage SE, Sampson RD, Kalargyrou A, De Rossi G, Rizzi M, et al. Late neuroprogenitors contribute to normal retinal vascular development in a *Hif2a* -dependent manner. *Development*. 2018 Jan 1;
38. Eising E, Carrion-Castillo A, Vino A, Strand EA, Jakielski KJ, Scerri TS, et al. A set of regulatory genes co-expressed in embryonic human brain is implicated in disrupted speech development. *Mol Psychiatry*. 2019 Jul 20;24(7):1065–78.
39. Granadillo JL, P.A. Stegmann A, Guo H, Xia K, Angle B, Bontempo K, et al. Pathogenic variants in *TNRC6B* cause a genetic disorder characterised by developmental delay/intellectual disability and a spectrum of neurobehavioural phenotypes including autism and ADHD. *J Med Genet*. 2020 Oct;57(10):717–24.
40. Vilaro E, Barbato C, Ciotti M, Cogoni C, Ruberti F. MicroRNA-101 Regulates Amyloid Precursor Protein Expression in Hippocampal Neurons. *Journal of Biological Chemistry*. 2010 Jun;285(24):18344–51.
41. De D, Mukherjee I, Guha S, Paidi RK, Chakrabarti S, Biswas SC, et al. Rheb-mTOR activation rescues A $\beta$ -induced cognitive impairment and memory function by restoring miR-146 activity in glial cells. *Mol Ther Nucleic Acids*. 2021 Jun;24:868–87.
42. Carlson KM, Melcher L, Lai S, Zoghbi HY, Clark HB, Orr HT. Characterization of the Zebrafish *atxn1/axh* Gene Family. *J Neurogenet*. 2009 Jan;23(3):313–23.
43. Bellanti F, Iannelli G, Blonda M, Tamborra R, Villani R, Romano A, et al. Alterations of Clock Gene RNA Expression in Brain Regions of a Triple Transgenic Model of Alzheimer's Disease. *Journal of Alzheimer's Disease*. 2017 Jul 17;59(2):615–31.

44. Suh J, Romano DM, Nitschke L, Herrick SP, DiMarzio BA, Dzhala V, et al. Loss of Ataxin-1 Potentiates Alzheimer's Pathogenesis by Elevating Cerebral BACE1 Transcription. *Cell*. 2019 Aug;178(5):1159-1175.e17.
45. Lu NN, Tan C, Sun NH, Shao LX, Liu XX, Gao YP, et al. Cholinergic Grb2-Associated-Binding Protein 1 Regulates Cognitive Function. *Cerebral Cortex*. 2018 Jul 1;28(7):2391–404.
46. Reichenstein M, Borovok N, Sheinin A, Brider T, Michaelievski I. Abelson Kinases Mediate the Depression of Spontaneous Synaptic Activity Induced by Amyloid Beta 1–42 Peptides. *Cell Mol Neurobiol*. 2021 Apr 12;41(3):431–48.
47. Claudio JO, Lutchman M, Rouleau GA. Widespread but cell type-specific expression of the mouse neurofibromatosis type 2 gene. *Neuroreport*. 1995 Oct;6(14):1942–6.
48. Ahmad F, Singh K, Das D, Gowaikar R, Shaw E, Ramachandran A, et al. Reactive Oxygen Species-Mediated Loss of Synaptic Akt1 Signaling Leads to Deficient Activity-Dependent Protein Translation Early in Alzheimer's Disease. *Antioxid Redox Signal*. 2017 Dec;27(16):1269–80.
49. Zu G, Sun K, Li L, Zu X, Han T, Huang H. Mechanism of quercetin therapeutic targets for Alzheimer disease and type 2 diabetes mellitus. *Sci Rep*. 2021 Nov 25;11(1):22959.
50. Sulistio YA, Heese K. The Ubiquitin-Proteasome System and Molecular Chaperone Deregulation in Alzheimer's Disease. *Mol Neurobiol*. 2016 Mar 7;53(2):905–31.
51. Qian X hang, Liu X li, Chen S di, Tang H dong. Integrating peripheral blood and brain transcriptomics to identify immunological features associated with Alzheimer's disease in mild cognitive impairment patients. *Front Immunol*. 2022 Sep 9;13.
52. Sun YX, Ji X, Mao X, Xie L, Jia J, Galvan V, et al. Differential Activation of mTOR Complex 1 Signaling in Human Brain with Mild to Severe Alzheimer's Disease. *Journal of Alzheimer's Disease*. 2013 Nov 13;38(2):437–44.
53. Lian B, Liu M, Lan Z, Sun T, Meng Z, Chang Q, et al. Hippocampal overexpression of SGK1 ameliorates spatial memory, rescues A $\beta$  pathology and actin cytoskeleton polymerization in middle-aged APP/PS1 mice. *Behavioural Brain Research*. 2020 Apr;383:112503.
54. Croze E, Yamaguchi KD, Knappertz V, Reder AT, Salamon H. Interferon-beta-1b-induced short- and long-term signatures of treatment activity in multiple sclerosis. *Pharmacogenomics J*. 2013 Oct 19;13(5):443–51.

55. Xiu X, Zhang H, Xue A, Cooper DN, Yan L, Yang Y, et al. Genetic evidence for a causal relationship between type 2 diabetes and peripheral artery disease in both Europeans and East Asians. *BMC Med.* 2022 Aug 31;20(1):300.
56. Park H, Lee YB, Chang KA. miR-200c suppression increases tau hyperphosphorylation by targeting 14-3-3 $\gamma$  in early stage of 5xFAD mouse model of Alzheimer's disease. *Int J Biol Sci.* 2022;18(5):2220–34.
57. Sathe G, Na CH, Renuse S, Madugundu AK, Albert M, Moghekar A, et al. Quantitative Proteomic Profiling of Cerebrospinal Fluid to Identify Candidate Biomarkers for Alzheimer's Disease. *Proteomics Clin Appl.* 2019 Jul 25;13(4):1800105.
58. Zheng X, Lin W, Jiang Y, Lu K, Wei W, Huo Q, et al. Electroacupuncture ameliorates beta-amyloid pathology and cognitive impairment in Alzheimer disease via a novel mechanism involving activation of TFE3 (transcription factor EB). *Autophagy.* 2021 Nov 2;17(11):3833–47.
59. Gennarino VA, Alcott CE, Chen CA, Chaudhury A, Gillentine MA, Rosenfeld JA, et al. NUDT21-spanning CNVs lead to neuropsychiatric disease and altered MeCP2 abundance via alternative polyadenylation. *Elife.* 2015 Aug 27;4.
60. Alcott CE, Yalamanchili HK, Ji P, van der Heijden ME, Saltzman A, Elrod N, et al. Partial loss of CFIm25 causes learning deficits and aberrant neuronal alternative polyadenylation. *Elife.* 2020 Apr 22;9.
61. Wang H, Fan L, Wang H, Ma X, Du Z. Amyloid  $\beta$  Regulates the Expression and Function of AIP1. *Journal of Molecular Neuroscience.* 2015 Jan 2;55(1):227–32.
